1 **Plasmotype condition nuclear pleiotropic effects on clock and fitness in barley**

2

3 Corresponding author:

4 Eyal Fridman

5 Plant Sciences Institute, Volcani Agricultural Research Organization (ARO), Bet

6 Dagan, Israel

7

8 Tel: +972 3 968 3901

9 Fax: +972 3 966 9583

10

11 Running title: Cytonuclear control of clock and fitness in barley

12

13 Eyal Bdolach<sup>1,2</sup>, Manas Ranjan Prusty<sup>1</sup>, Lalit Dev Tiwari<sup>1</sup>, Khalil Kashkush<sup>2</sup>, Eyal

14 Fridman<sup>1</sup>

15

16 <sup>1</sup>Plant Sciences Institute, Volcani Agricultural Research Organization (ARO), Bet

17 Dagan, Israel

18 <sup>2</sup>Department of Life Sciences, Ben-Gurion University, 84105, Beer-Sheva, Israel

19

20 Analyzing barley populations that segregate for plasmotype and nucleotide diversity

21 we demonstrate how the clock is associated with cytonuclear diversity and with

22 pleiotropic effects on fitness

23

24 This work was supported by grants from the Israel Science Foundation (ISF 444/21)

25 and Horizon2020/CAPITALISE AMD-862201-2 grants to E.F.

26

27 Corresponding author email: [fridmane@agri.gov.il](mailto:fridmane@agri.gov.il)

28

29

30

31

32

33 **ABSTRACT**

34

35 In plants, the role of chloroplasts and mitochondria (plasmotype) in controlling  
36 circadian clock plasticity and overall plant robustness has not been elucidated. In this  
37 study, we investigated the rhythmicity of chlorophyll fluorescence (Chl F) clock  
38 output, and fitness in the field at optimal and elevated temperatures, in three different  
39 barley populations. First, we examined a reciprocal DH population between two wild  
40 barley (*Hordeum vulgare* ssp. *spontaneum*), in which we identified two pleiotropic  
41 QTLs (*frp2.1* and *amp7.1*) that modulate clock and fitness including conditioning of  
42 these effects by plasmotype diversity. In the second population, a complete diallel  
43 consisting of 11 genotypes (reciprocal hybrids differing in plasmotype), we observed  
44 a gradual reduction in plasmotype, ranging from 26% and 15% for Chl F and clock  
45 measurements to 5.3% and 3.7% for growth and reproductive traits, respectively. The  
46 third population studied was a collection of cytelines in which nine different wild  
47 plasmotypes replaced the cultivated Noga (*H. vulgare*) plasmotype. Here, the order  
48 and magnitude of the effects of the plasmotypes differed from what we observed in  
49 the diallel population, with the greatest effect of plasmotype diversity observed for  
50 clock period and amplitude. Comparison of the chloroplast sequences suggests several  
51 candidate genes in the plastid-encoded RNA polymerase (PEP) complex that may be  
52 responsible for the observed plasmotype effects. Overall, our results unravel  
53 previously unknown cytonuclear epistatic interactions that controls clock performance  
54 while also having pleiotropic effects on a plant field characteristics.

55

56

## 57 INTRODUCTION

58 Plants are composed of cells in which three different organelle genomes co-  
59 evolved to cope with a dynamic environment: the genomes in nuclei, chloroplast and  
60 mitochondria (plasmotype). Phenotypic constraints promote selection of causal  
61 mutations in those three genomes and at the same time, interactions between genome  
62 products may impose epistatic relationship and co-evolution of adaptive gene  
63 complexes. In recent years, several studies have shown that phenotypic effects are  
64 related to the genetic diversity of the plasmotype and its interactions with the  
65 nucleotype (Joseph et al, 2013; Roux et al, 2016; Tang et al, 2014). An elegant use of  
66 haploid-inducer line available in *Arabidopsis* (*GFP-tailswap*) (Ravi et al., 2014)  
67 allowed generating a set of reciprocal and isogenic cybrids using several accessions,  
68 which was followed by phenotyping of metabolism and photosynthesis under  
69 different light conditions (Flood et al., 2020). Genetic analysis revealed that the  
70 nucleotype, plasmotype and their interaction accounted for 91.9, 2.9 and 5.2% of  
71 genetic variation, respectively, thus highlighting the importance of interactions  
72 between genomes. Moreover, variation explained due to cytonuclear epistasis was  
73 even higher (17.8%) for  $\Phi_{NPQ}$  and changed significantly between different light  
74 regimes.

75 In crop plants, few reports exist on the contribution of cytonuclear interactions  
76 (CNI) to a plant's phenotype, and even less to its effects on the plant's phenotypic  
77 plasticity. Especially in grasses, the contribution of the plasmotype to yield and grain  
78 quality has been demonstrated (Frei et al., 2003; Sanetomo and Gebhardt, 2015). In  
79 cucumber, Gordon and Staub (2011) used reciprocal backcrosses between chilling-  
80 sensitive and chilling-tolerant lines to show that tolerance to reduced temperature is  
81 maternally inherited. Likely these traits are the result of a local adaption of the  
82 original wild alleles, since for example in bread wheat (*Triticum aestivum*)  
83 cytoplasmic influence on fruit quality is affected by genotype-by-environment  
84 interactions (Ekiz et al., 1998). Nevertheless, many of these examinations of  
85 alloplasmic lines, which contained cytoplasm from distantly related wild relatives  
86 showed that effects on agronomic traits (rather than protein quality) are not frequent  
87 (Frei et al., 2010). In maize, although cytoplasmic effects were not significant  
88 between the direct and reciprocal populations, the interactions among the cytoplasm  
89 and the nuclear quantitative trait loci (QTL) were detected for both days to tassel, and  
90 days to pollen shed (Tang et al., 2014), further enforcing the increased variation

91 explained in *Arabidopsis* cybrids when cytonuclear interactions are included (Flood et  
92 al., 2020).

93 Circadian clock rhythms in plants are interwind with chloroplastic activities  
94 including photosynthetic phenotypes such as NPQ and  $\Phi$ PSII that are important for  
95 plant productivity (Kromdijk et al., 2016). This connection led to the development of  
96 several high-throughput methods that measure the rhythmicity of the leaf chlorophyll  
97 fluorescence as a proxy to the period, phase and amplitude of the clock (Gould et al.,  
98 2009; Tindall et al., 2015; Dakhiya et al., 2017;). The ability to measure hundreds of  
99 plants allowed comparisons between species (Rees et al., 2019), identification of  
100 correlation for period and amplitude with temperature and soil composition (Dakhiya  
101 et al., 2017), as well as associating between naturally occurring circadian rhythm  
102 variation with clock gene loci in Swedish *Arabidopsis* accessions (Rees et al., 2021).  
103 Using the SensyPAM platform, which allows to infer clock output rhythmicity based  
104 on photosynthetic parameters (Bdolach et al., 2019), we recently analyzed wild,  
105 landraces, cultivars and interspecific barley populations. We showed that some of the  
106 nuclear loci that control the circadian rhythms were under selection during  
107 domestication, which could explain how modern crops lost the thermal plasticity of  
108 their clock (Prusty et al., 2021). Furthermore, pleiotropic effects of these drivers of  
109 clock (DOC) loci on grain yield under stress indicate the adaptive value of clock  
110 plasticity although the molecular, developmental, and physiological basis of this  
111 pleiotropy requires more experiments. Moreover, this study did not consider the  
112 possible role of cytoplasm diversity in manifesting these clock and pleiotropic effects  
113 on growth and reproductive fitness traits.

114 Here we follow up on the clock analysis of a reciprocal bi-parental doubled  
115 haploid (DH) population divided between genotypes carrying different plasmotypes  
116 from the Barley1K collection (from Ashkelon or Mount Hermon) (Hubner et al.,  
117 2009), and segregating for their nuclear genomes as well. We previously showed a  
118 significant difference of 2.2 h in the clock plasticity (delta of period) between the  
119 carriers of the different plasmotypes (Bdolach et al., 2019). In addition, we identified  
120 several nucleotide QTL that affected the period or the amplitude of the rhythmicity,  
121 based on  $\Phi$ NPQ<sub>ss</sub> measurements. In the current study, we intend to 1) extend the  
122 analysis of the plasmotype effects on fitness traits and test if there is pleiotropy  
123 between clock and life history traits, and 2) to extend the breadth of plasmotype  
124 diversity tested by adding additional crosses and more chloroplast sequencing

125 information, and finally 3) to examine the potential of wild plasmotype diversity for

126 modern crop breeding under optimal and high temperature.

127

128

## 129 RESULTS

130 We wished to examine the effects of plasmotype diversity on growth and  
131 productivity of barley grown under ambient vs high temperatures and test possible  
132 relationship between circadian clock and growth plasticity. Previously, we described  
133 the generation of the ASHER doubled haploid population from two reciprocal hybrids  
134 between **Ashkelon** (B1K-09-07) and **Hermon** (B1K-50-04) wild barleys (Bdolach et  
135 al., 2019) This population of 121 genotypes is composed of 40 and 81 carriers of the  
136 B1K-09-07 and B1K-50-04 cytoplasms, respectively, whereby significant differences  
137 between two groups could be associated with plasmotype (mitochondria and  
138 chloroplast) variation. In addition to the homozygous ASHER population we  
139 developed an additional population by carrying out a set of reciprocal crosses between  
140 11 wild barley accessions to achieve a full-diallel with few genotypes missing (see  
141 Methods). The rationale behind the diallel population is that any difference between  
142 pairs of hybrids can be associated with plasmotype differences between homozygous  
143 parental lines. Finally, we wanted to investigate the potential utility of the wild  
144 plasmotype for cultivated material and therefore generated and tested cytolines in the  
145 cultivar Noga background.

146

### 147 *Life history phenotypic responses in barley growing under high temperature*

148 The plants of both the ASHER and diallel populations were phenotyped for life  
149 history traits and tested for differences between ambient temperature (AT) and high  
150 temperature (HT) from beginning of tillering stage until grain filling. We found that  
151 most of the life history traits were significantly different between the two  
152 environments in both populations (Fig. 1a and 1b). In ASHER (Fig 1a), Days to  
153 flowering (DTF) was significantly lower under HT ( $69 \pm 4.3$  days) as compared to AT  
154 ( $100 \pm 3.6$  days) (Fig 1a). The reproductive traits were higher under AT vs HT  
155 conditions (avg spike dry weight (ASDW)= $0.89 \pm 0.13$  vs.  $0.7 \pm 0.12$  gr and Spikes dry  
156 weight (SpDW)= $7.8 \pm 1.9$  vs  $6.24 \pm 1.7$  gr, respectively). Plant height (PH) at harvest  
157 was also higher under AT ( $124.9 \pm 8.5$  cm) than under HT ( $108.1 \pm 7.8$  cm) although  
158 vegetative dry weight (VDW) was lower under AT, i.e.  $13.1 \pm 3.5$  gr vs  $14.4 \pm 4.7$  gr in  
159 HT. As a result, Total dry matter (TDM) was not significantly different between  
160 environments (AT,  $20.8 \pm 5.6$  and HT,  $20.5 \pm 6$  gr). Spike length (SL) also was not  
161 significantly different between environments (AT,  $9.7 \pm 0.9$  and HT,  $9.7 \pm 1$  cm) while  
162 the variation in the number of spikes per plant (calculated as the coefficient of

163 variation (CV), SLCV) is significantly lower (more stable) under AT (AT,  $8.3 \pm 1.6$   
164 and HT,  $11.03 \pm 4.2$  %). This could also be viewed based on the wider distribution in  
165 the SLCV under HT. It is interesting to note that while the HT affected the SpDW and  
166 included in fact reproductive output loss, the VDW worked in an opposite manner  
167 including gain in the weight of the non-reproductive parts under HT.

168 Unlike in the ASHER population, in the diallel experiment we noticed almost  
169 identical DTF between HT and AT (DTF= $-109.9 \pm 5.6$  and  $111.73 \pm 4.97$  days,  
170 respectively) (Fig 1b). Similarly, unlike the significant effects of the thermal  
171 environment on the vegetative traits, the reproductive traits were less affected. ASDW  
172 is significantly yet mildly lower under AT ( $0.93 \pm 0.24$  gr) than under HT ( $1.03 \pm 0.27$   
173 gr). For SpDW we could not detect a significant difference between environments  
174 ( $7.13 \pm 2.2$  and  $7.35 \pm 3.16$  gr, respectively). PH is also not significantly different  
175 between environments ( $104.06 \pm 10.17$  cm in AT and  $104.04 \pm 12.05$  cm in HT), as  
176 compared to VDW and TDM that were significantly lower under AT ( $11.29 \pm 4$  and  
177  $18.5 \pm 5.5$  gr) than HT ( $16.38 \pm 6.8$  and  $24.13 \pm 9.08$  gr). SL and SLCV are  
178 significantly lower under AT.

179 To summarize, in both field experiments of the two populations (ASHER and  
180 diallel) the plants on average accumulated lesser VDW and showed higher stability  
181 between spikes, i.e. lower VDW and SLCV, under AT. In addition, doubled haploid  
182 plants were flowering earlier under HT.

183

#### 184 ***Plasmotype effects on plasticity of life history traits, circadian clock, and Chl F***

185 The ASHER population is composed of two sub populations, each carrying  
186 either the Ashkelon or Hermon plasmotypes (Bdolach et al., 2019). On average,  
187 carriers of the Hermon plasmotype flowered significantly earlier than the Ashkelon  
188 types under both HT and AT however, in both subpopulations, this manifested in the  
189 same acceleration of flowering by more than 2 days (Fig. 2a). For SL there is no  
190 difference (Fig 2b), but for the SLCV Hermon plasmotype is linked with lesser  
191 stability (Fridman, 2015), i.e. higher CV under HT ( $14.45\%$  under HT vs  $8.8\%$  under  
192 AT) as compared to Ashkelon ( $12.33\%$  under HT vs  $9.32\%$  under AT) (Fig. 2c).  
193 Perhaps the most interesting comparison is between the total vegetative and  
194 reproductive outputs. The carriers of the Ashkelon plasmotype are on average very  
195 plastic for the plant biomass and for the derived total dry matter (Fig. 2d and 2e),  
196 while the Hermon plasmotype types are relatively stable for the biomass and respond

197 significantly with reduction of the spikes dry weight under heat (Fig. 2f). This is in  
198 comparison to the relative stable SpDW of the Ashkelon types (Fig. 2f).

199         The reciprocal nature of the hybrids in the full-diallel allowed us to group the  
200 F1 plants into different plasmotype subpopulations and different male parent  
201 subpopulations (representing the nucleotype). One-way ANOVA for each of these  
202 two sub-populations indicated larger percentage variation explained (PVE) by the  
203 nucleotype (male donors), in comparison to differences between plasmotype (female  
204 donors) for few traits (Table 1). For example, for the ASDW under HT (PVE=41%  
205 for nucleotype vs PVE=27% for plasmotype) and DTF under AT (PVE=43% vs  
206 PVE=32%) and HT (PVE=37% vs 28%). For majority of the life history traits we  
207 found higher variation that explained by the plasmotype than nucleotype under both  
208 temperatures (AT and HT): for PH, PVE=39% vs 30% and 33% vs 21% under AT  
209 and HT, respectively. This was true also for reproductive output, e.g SpDW which  
210 showed higher variance between plasmotypes in AT (PVE=35% vs 21%) and to a  
211 lesser extent under HT (PVE=23% vs 19% between plasmotype and nucleotype  
212 contributions).

213         We also included similar clock analysis to the hybrids of the diallel as we  
214 previously conducted for the ASHER population, i.e. under optimal (OT) and high  
215 temperatures (HT) environments using SensPAM (See Methods; Bdolach et al.,  
216 2019). The clock rhythmicity (amplitude and period) is based on NPQ<sub>lss</sub>  
217 measurements for three days under constant light (Dakhiya et al., 2017) ( . The clock  
218 amplitude was significantly higher under HT ( $0.03 \pm 0.01$ ) compared to OT ( $0.015$   
219  $\pm 0.006$ ) (Fig 3a). Regarding the clock period, we observed significantly higher values  
220 under OT ( $24.9 \pm 2.6$  h) in comparison to HT ( $23.3 \pm 1.9$  h; Fig 3b). This clock  
221 plasticity is similar to the one described for the ASHER population (Bdolach et al.,  
222 2019) with acceleration of the rhythmicity under higher temperatures. Fv/Fm is  
223 significantly higher under HT ( $0.93 \pm 0.01$ ) in comparison to OT ( $0.92 \pm 0.01$ ; Fig 3c)  
224 and significantly different for Fv/Fm<sub>lss</sub> ( $0.9 \pm 0.01$  in OT vs  $0.91 \pm 0.01$  in HT; Fig  
225 3d). NPQ<sub>lss</sub> and Rfd are significantly different under OT in comparison to HT  
226 (NPQ<sub>lss</sub>  $0.66 \pm 0.1$  vs  $0.43 \pm 0.08$  and Rfd  $1.6 \pm 0.2$  vs  $1.18 \pm 0.18$ ; Fig 3e and f).  
227 Overall, these F results suggest that under HT, photosynthesis is more efficient.

228         Differences between the contributions of plasmotype and nucleotype to clock  
229 traits in the diallel are also found (Table 1), but to a lesser extent than for fitness traits.  
230 This includes higher PVE by the plasmotype of 34% compared to 22% by nucleotype



231 for period under HT. Similarly, the delta amplitude variation between hybrids is better  
232 explained by plasmotype (32%) compared to nucleotype (24%) (Table 1).

233

234 ***Relationship between plasmotype and nuclear diversity and pleiotropic effects on***  
235 ***circadian clock and life history traits***

236

237 In the diallel population we tested if there are reciprocal hybrids that  
238 significantly differ for life history and SensyPAM traits (Fig 4). We clustered  
239 phenotype measured in the nethouse as growth or reproductive ones and traits  
240 measured with SensyPAM as clock or Chl F parameters. The percentage of differing  
241 pairs of reciprocal hybrids is the highest for Fv/Fm under OT (44.8%) and the lowest  
242 is zero hybrids for the difference of DTF under AT. If comparing the traits according  
243 to our clustering, we could see that the mean number of differing reciprocal hybrids is  
244 highest for Chl F (26.3%), and second for clock traits (15%), while growth and  
245 reproductive traits are falling behind with 5.23% and 3.73%, respectively.

246 One direct attempt to test for the relationship between circadian clock behavior  
247 under OT and HT to that of the plants fitness in the field is to perform simple linear  
248 regression between the different traits (Table S1). We found the highest positive  
249 clock-fitness correlations exist between period under HT and the two time points of  
250 tiller height measurements at the tillering stage and the rate between them ( $r=0.432$   
251 and  $0.535$ ). Period under HT is also positively correlated to ASDW and SL under AT  
252 ( $r=0.46$  and  $0.42$ , respectively). This suggests that faster growth under both AT and  
253 HT is connected to longer clock periods under HT. Negative correlation was found  
254 between thermal responses of the amplitude (delta amplitude (dAMP) between HT  
255 and AT) and DTF under AT and HT ( $r=-0.44$  and  $-0.5$ ), i.e. the greater the value for  
256 dAMP, the earlier plants reach flowering. We also identified highly positive  
257 correlation between dAMP and SpDW under AT ( $r=0.45$ ). Finally, we found negative  
258 correlations between Fv/Fm and Fv/Fmlss under both OT and HT and PH under AT  
259 and HT and a smaller positive correlation with NPQlss.

260 Another way to look into the relationship between clock and growth traits is  
261 through pleiotropy (same locus affecting several traits; (Chen and Lübberstedt,  
262 2010)). We previously obtained circadian clock phenotypes and used this data for a  
263 genome scan in the ASHER DH population. This allowed us to identify several QTLs  
264 linked with variation in amplitude, period and heat responses (delta of the traits) and

265 to verify them by segregation analysis (Bdolach et al. 2019). Here, we performed a  
266 similar genome scan analysis with the new set of field phenotypes (see Methods), and  
267 we also tested genetic models that include plasmotype and nuclear QTL interactions  
268 (cytonuclear, or GxG interactions). The genome scan identified several major QTL  
269 that are associated with the different traits, including few that we found to be  
270 pleiotropic (Fig 5a). On chromosome 2 we found several significant QTLs for SDW  
271 under HT (LOD=3.04), for VDW under HT and QxE (LOD= 8.86 and 8.68,  
272 respectively). In addition, we positioned a major QTL for PH under HT (LOD=6.35)  
273 which resides at the coordinates as the *frp2.1* locus that we linked previously with  
274 circadian clock period plasticity in the same population (Bdolach et al., 2019). This  
275 major pleiotropic QTL resides between positions 698,875,542 and 702,308,910  
276 (Morex v1). In the previous work, we identified this locus based on a threshold model,  
277 where we translated the period plasticity phenotype of the DH lines into a binary  
278 vector. For PH, there was no significant difference between carriers of the two alleles  
279 under AT, but under HT the Ashkelon allele was associated with a significant higher  
280 PH than the Hermon allele (114.65 cm vs 108.53 cm, respectively) (Fig 5b). In  
281 addition, carriers of the Ashkelon allele had on average a significantly higher VDW  
282 under HT vs. AT (24.57 gr and 19.93 gr, respectively), which is significantly higher  
283 than the results obtained for Hermon allele carriers under both treatments (14.86 gr in  
284 AT and 16.01 gr in HT). VDW also showed a significant QxE interaction explaining  
285 50% of the trait variation (Fig. 5c). Another mild pleiotropic QTL is *amp7.1*  
286 individually found for Amplitude under HT and QxE on chromosome 7 (498,472,330-  
287 510,903,725; Morex v1). In this study we found this QTL for SL under HT (LOD=  
288 8.47) (Fig 5a). For this QTL, SL of the Hermon allele carriers is higher in both  
289 treatments than those DH carrying the Ashkelon allele (10.4 and 10.34 cm vs 9.66 and  
290 9.5, respectively) (Fig 5d).

291 Finally, we tested the possible interactions between plasmotype and nuclear  
292 QTLs, i.e. whether the plasmotype diversity is conditioning the effects of the nuclear  
293 QTL. Under AT, for both VDW and SpDW the effect of the *frp2.1* QTL on Ashkelon  
294 vs. Hermon phenotypes was severely dependent on the DH plant carrying the  
295 Ashkelon plasmotype (Fig. 6a and 6c). This epistatic effect of the plasmotype over the  
296 nuclear locus was also found for VDW under HT (Fig. 6a) but did not appear when  
297 looking at the reproductive output under HT (Fig. 6d). Superimposing a reaction norm  
298 onto the interaction plot (Fig. 6b-d) indicates that recombination between the two loci

299 (plasmotype and *frp2.1*) leads to an opposite behavior for the reproductive output.  
300 While no significant changes were observed between the slopes of the different  
301 plasmotype-*frp2.1* combinations for AT and HT, the carriers of the Hermon  
302 plasmotype with the Ashkelon allele at *frp2.1* showed increased reproductive output  
303 under HT compared to AT, in an opposite manner to the combination of Hermon-  
304 Hermon in both nuclear and cytoplasmic loci (Fig. 6f).

305 Additional significant cytonuclear interactions for a pleiotropic QTL, on clock  
306 and growth, was found for *amp7.1* and its combined effects on days to flowering. In  
307 this *amp7.1*-plasmotype combination, we observed significant cross-over effects  
308 (Malosetti et al., 2013), i.e. changes in the order of the *amp7.1* genotypes between the  
309 two different plasmotypes (figure 2). However, in this combination, the reaction  
310 norms looked identical between the four cytonuclear combinations.

311

### 312 ***Plasmotype variation in Cytolines in clock rhythmicity, Chl F and life history traits***

313 To test the hypothesis that the plasmotype has a role in regulating phenotypic  
314 diversity and could be utilized for breeding heat tolerance, we backcrossed several  
315 wild barley accessions with a cultivated elite line while keeping the wild plasmotype,  
316 in order to obtain nearly-isogenic cytolines (see Methods). The cytolines were tested  
317 in the SensyPAM under OT and HT for clock rhythmicity (measured from NPQlss)  
318 and Chl F, and in the nethouse for life history traits under AT and HT (Fig S1c). We  
319 calculated delta values between HT to OT or AT, in SensyPAM as well as in the  
320 nethouse, for each trait as a measure of the thermal plasticity (Fig. 7). We found  
321 significant differences between cytolines for clock period under HT ( $P=0.004$ ) and not  
322 under OT ( $P=0.17$ ) (Fig S3a). Notably, the single cytoline that decelerated the clock  
323 significantly between OT and HT is the one carrying the B1K-03 plasmotype (Noga<sup>03</sup>,  
324 decelerated by 4.3h,  $P<0.05$ ; Fig 7a). Unlike the relative uniformity between cytolines  
325 for period under OT and HT (Fig. S3a) the variance between cytolines for clock  
326 amplitude was significant under both OT ( $P=0.0001$ ) and HT ( $P=0.006$ ) (Figure S3b).  
327 Most of the cytolines showed a significant delta except Noga<sup>249</sup> (Fig 7b). Similar to  
328 the calculated amplitude (based on NPQlss rhythmicity) the physiological traits of Chl  
329 F are significantly influenced by the plasmotype diversity both under OT ( $P=0.0002$   
330 and  $P<0.0001$ ) and HT ( $P<0.0001$ ) (Fig S3c and d) and all cytolines show high  
331 thermal plasticity (Fig 7c and d).

332 We tested cytolines also in nethouse under AT and HT conditions. Differences  
333 between cytolines for DTF were significant only under HT (average of  $117 \pm 17.4$   
334 days) including a delay in flowering and no difference was detected under AT  
335 (average of  $107 \pm 7.8$  days). The difference in DTF between cytolines is significant  
336 under AT ( $P < 0.0001$ ), but no significant difference under HT, presumably since less  
337 plants were involved and not all the cytolines reached the flowering stage due to  
338 extreme temperatures observed during the year 2021 (Fig. S1). Plants were  
339 significantly higher under AT ( $PH = 105.6 \pm 10.4$  cm) compared to HT ( $72.2 \pm 12.6$  cm)  
340 with all cytolines showing a significant plasticity (Fig 7f). Nevertheless, in both AT  
341 and HT treatments the cytolines were not significantly different for PH, SPP, SpDW,  
342 VDW and SL (Tukey-Kramer test;  $P < 0.05$ ) (Fig S4b to f). There was no significant  
343 difference for Spikes per plant (SPP) between AT ( $13.64 \pm 5.4$ ) and HT ( $12.1 \pm 5.9$ )  
344 and no significant delta (Fig. 7g). Cytolines Noga<sup>09</sup> and Noga<sup>249</sup> are more similar to  
345 Noga as compared to delta small difference indeed observed among other lines  
346 between treatments. There was a significant reduction in the SpDW between AT ( $16.7$   
347  $\pm 7.5$  gr) and HT ( $9 \pm 6.3$  gr) (Fig S4d), depicting the heat's clear detrimental effects on  
348 reproductive fitness. There is a large difference in SpDW-related delta values between  
349 the three cytolines Noga<sup>02</sup>, Noga<sup>03</sup>, and Noga<sup>386</sup>, and Noga (Fig 7h). VDW is  
350 significantly different between AT ( $21.16$  gr) and HT ( $17.8$  gr) and the delta values  
351 for Noga<sup>09</sup> and Noga<sup>249</sup> differ a lot from the values observed for Noga. VDW shows a  
352 highly significant decrease between AT ( $21.2 \pm 8.2$  gr) and HT ( $18.1 \pm 7.1$  gr) and high  
353 variance exists between cytolines regarding their delta values. However, only Noga<sup>249</sup>  
354 differs in delta from Noga. SL also changes significantly between AT ( $11.2 \pm 1.3$  cm)  
355 and HT ( $9.1 \pm 1.9$  cm), and there is high variance between the cytolines, Noga<sup>249</sup>,  
356 Noga<sup>29</sup>, Noga<sup>386</sup> and Noga<sup>50</sup> cytolines being significantly different in delta from Noga  
357 (Fig. 7j).

358

### 359 ***Candidate chloroplast diversity underlying traits variation***

360 In our previous study (Bdolach et al., 2019) we obtained and compared the  
361 chloroplast sequences of B1K-09-07 and B1K-50-04, which represent the parental  
362 lines of the ASHER doubled haploid population. Here, we expanded the collection of  
363 wild barley chloroplast sequences and included nine additional accessions (see  
364 Methods), in an attempt to associate the variation in clock and life history traits  
365 observed in the diallel to organelle genome diversity. Since our diallel doesn't meet

366 the population size criteria necessary for GWAS, we performed a Student's t-Test for  
367 each *clp* haplotype with the different traits and corrected for the multiple testing  
368 (number of haplotypes; see Methods). Sequence alignments of the 11 chloroplast  
369 genomes identified 11 distinct haplotypes which include one to three genes (Table  
370 S2). Overall, we could observe that among the diallel hybrids, *clp* haplotypes are  
371 more significantly associated with variation in reproductive, compared to other trait  
372 types. (Fig 8). Previously, the comparison between Ashkelon and Hermon's  
373 chloroplast genomes (B1K-09-07 and B1K-50-04) identified a non-synonymous SNP  
374 at the *rpoC1* gene (position: 24553; N571K) and we speculate that this gene could be  
375 responsible for the clock difference between the two subpopulations within ASHER  
376 (Bdolach et al., 2019). In the current diallel, the *rpoC1* and *matK* (position: 2099) co-  
377 segregate and this *matK/rpoC1* haplotype is significantly associated with DTF under  
378 AT and HT ( $P < 0.0001$ ) but not with the clock traits. However, another member of the  
379 PEP complex (Hess et al., 1993; Gajecka et al., 2021), i.e. *rpoC2*, appeared as a  
380 significant QTLs for several growth and reproductive traits. Within *rpoC2* we  
381 identified four SNPs (positions: 26445, 26808, 28702 and 29415) with the first two  
382 SNPs being in full linkage disequilibrium (LD), i.e. they are co-segregating between  
383 lines. The third and fourth *rpoC2* SNPs are each in LD as well, either with *ndhC*  
384 (position: 49896) or with *atpl* (31364) and *rps3* (80078). Within the diallel, the first  
385 *rpoC2* haplotype (namely *rpoC2*) is significantly associated with ASDW under both  
386 AT and HT for ( $p < 0.0003$  and  $0.003$ , respectively), DTF ( $p < 0.0007$  and  $0.0012$ ,  
387 respectively), SL ( $0.0009$  and  $0.0004$ , respectively) and VDW ( $0.0014$  and  $0.0004$ ,  
388 respectively) and only under AT it is associated with TDM ( $p < 0.0012$ ). The second  
389 haplotype, *rpoC2/ndhC*, is only significant for SL under AT ( $0.0004$ ). The  
390 *rpoC2/atpl/rps3* haplotype is also significant under both AT and HT for SpDW  
391 ( $p < 0.0001$  and  $0.0022$ ), TDM ( $p < 0.0001$  and  $0.0015$ ) and VDW ( $p < 0.0017$  and  
392  $0.0049$ ). This *rpoC2/atpl/rps3* haplotype is significant ( $p < 0.005$ ) for the clock trait  
393 dAmplitude. In *atpB* we identified two SNPs (positions: 52210 and 52297). For *cemA*  
394 and *ndhF*, and for *petB*, there was no significant association to any of the phenotypes.  
395 We identified *infA* and *ndhD* haplotypes as a significant QTLs ( $p < 0.0053$ ) for  
396 NPQ<sub>ss</sub> under HT. To summarize, in this diallel analysis we identified more diversity  
397 linked with reproductive traits, e.g DTF, than for clock traits. Nevertheless, significant  
398 association between the *rpoB/rpoC2/atp* haplotype and clock amplitude plasticity  
399 ( $\Delta$  Amp) could be observed.

400

401

402

403

404

405 **DISCUSSION**

406

407 *Whole plant and circadian clock responses to high temperatures and their*  
408 *interrelationship vs pleiotropy*

409 In this study we found significant responses of plant growth and clock rhythmicity  
410 under elevated temperature. Comparison between early and late growth phenotypes  
411 showed that plants growing in high temperatures initially gain some growth  
412 advantage, as reflected by the higher tiller heights measured at about one month after  
413 transplanting. However, at the final time of harvest the heat is correlated significantly  
414 with reduced height, biomass and reproductive output (Fig. 1). Also, we found that  
415 heat is related with loss of robustness of the growth as could be viewed in the  
416 significant elevated CV of the spikes. Interestingly, the population of inbreds  
417 (ASHER DH) seemed to be more affected than the diallel hybrids, with the latter  
418 maintaining, for example, a similar mean for PH and SL values. These differences in  
419 the stability of hybrids was reported in many plant species and might be related with  
420 higher allelic heterogeneity across the genome (Fridman, 2015), which to some extent  
421 may allow the plant to show a wider reaction norm as suggested in biochemical  
422 models of heterosis (Goff, 2011).

423       Regarding the circadian clock output, which is measured at the early stages of  
424 development during the transition to flowering (leaf 3-4), the heat exerted a  
425 significant effect in both populations (ASHER (Bdolach et al., 2019) and diallel; Fig.  
426 3), whereby the trends observed in the diallel are similar to those reported before for  
427 the DH population, with a mean acceleration of the clock by 1.97 hr and reduction of  
428 the amplitude by 2.4%. Although all traits were affected by the heat, the correlation  
429 matrix between them did not find many significant correlations between plasticity of  
430 clock and growth traits across either DH lines or hybrids. The link, however, could be  
431 established by pleiotropy at several loci such as *frp2.1* or *amp7.1* in the ASHER  
432 population, and with those QTLs CN1 on the clock as well as vegetative and  
433 reproductive output of the plants (Fig. 6). Genetic correlations among traits arise from  
434 the pleiotropic effects of genes on multiple traits and/or linkage disequilibrium among  
435 distinct loci, each affecting a single member of the character complex (Flaconer and  
436 Mackay, 1996). The major differences between lack of relationship by genetic  
437 correlation (Table S1) to one found by pleiotropy (Fig. 6) are probably the additional  
438 genetic correlations with unmeasured traits (Gellman and Turner, 2020), or de facto



439 inclusion of additional causal loci on either of the traits. For example, Vishnukiran et  
440 al. (2020) report major pleiotropic QTLs in rice between straw nitrogen and yield  
441 while there was no correlation between these two complex traits.

442

#### 443 *Nature of the plasmotype natural diversity contribute to phenotypic variance*

444 The genetic association we performed between the DNA diversity found among the  
445 wild barley in the ASHER or diallel population point to a significant effect of several  
446 haplotypes on the pleiotropic effects of clock and life history traits (Fig. 6 and Fig.  
447 S2). Previously, we reported on a non-synonymous variation in *rpoC1* (N571K) as a  
448 possible source for the significant differences in the clock plasticity between carriers  
449 of the plasmotype of B1K-50-04 and B1K-09-07 (Bdolach et. al. 2009). The plastidial  
450 *rpoC1* protein is a subunit of the holo-PEP complex (plastid encoded polymerase)  
451 known to interact with sigma factor 1-6, out of which at least SIG5 was shown to  
452 regulate rhythms of gene transcription, e.g., psbD (Noordally et al., 2013). Moreover,  
453 the PEP complex includes additional proteins encoded by chloroplast genes  
454 (Pfannschmidt et al., 2015) for which we identified association with pleiotropic  
455 effects on life history and clock traits (Fig. 8). This includes the link between diversity  
456 at the *rpoC2* and *rpoB* genes with the amplitude variation, mostly under HT.

457         Zooming in on this significant and hitherto unknown relationship between  
458 PEP variation and clock thermal plasticity will require a more thorough analysis of  
459 more advanced and isogenic lines. In the PEP complex, one major functional group is  
460 comprised of PAPs involved in DNA/RNA metabolism and gene expression  
461 regulation, while the second group is related to redox regulation and reactive oxygen  
462 species protection (Steiner et al., 2011). Moreover, the PEP is somehow coordinated  
463 with the nuclear encoding RNA polymerase (Pfannschmidt et al., 2015). Therefore,  
464 presumably non-synonymous variations (such as those between *rpoC2* alleles in  
465 current study) could be as effective as non-synonymous ones (between *rpoC1* alleles)  
466 in the functionality and variation we observed. It would be therefore required to look  
467 at different layers (transcriptome, proteome) between nearly isogenic and not  
468 necessarily knockout mutant lines to achieve relevant causal variation. Recent  
469 developments in plastid gene editing, also in cereals, may assist in generating and  
470 analyzing both types of mutations in barley and learn how they might modulate  
471 physiology and development of the plant under normal and high temperatures. Recent  
472 experiments suggest that most recent developments of TALEN-based allele editing



473 tested in *Arabidopsis* (Nakazato et al., 2021) could also be applied in barley (Fridman  
474 and Arimura, Personal communication) to allow such multi-layer analysis of isogenic  
475 mutants.

#### 476 *Candidate genes in the frp2.1 and amp7.1 loci*

477 We identified 48 and 71 high confidence genes in *frp2.1* and *amp7.1*,  
478 respectively. In the Barley NET we identified 751 genes that are interacting with the  
479 core clock genes in barley with scores ranging between 16 (highest) to 1.12 (lowest;  
480 Table S3-6). Within the *amp7.1* QTL region, we found four candidate genes  
481 including HORVU7Hr1G083270 (WRKY DNA-binding protein 70, score 1.89),  
482 HORVU7Hr1G083360 (NAD-dependent epimerase/dehydratase, score 1.42),  
483 HORVU7Hr1G084240 (transcription factor HY5, score 1.31), and  
484 HORVU7Hr1G084310 (overexpressor of cationic peroxidase 3, score 3.27). The  
485 guide (core circadian) genes for these interacting genes are PRR95 and PRR7 In  
486 *Arabidopsis*, the *HY5* binds with the G-box element of the *Lhcb* promoters thus  
487 indicating that *CCAI* can alter *HY5*-binding to the G-box through a direct protein–  
488 protein interaction in *Lhcb* and *CCAI* (Andronis et al., 2008). Furthermore, the  
489 absence of *HY5* leads to a shorter period of *Lhcb1*. This suggest that interaction of the  
490 *HY5* and *CCAI* proteins on *Lhcb* promoters is necessary for normal circadian  
491 expression of the *Lhcb* genes, which may be related to the F-based measurements in  
492 current study. Regarding the *frp2.1* QTL region, we found only one candidate  
493 interactive locus i.e. HORVU2Hr1G103620 (ABC transporter C family member 2,  
494 Score- 1.87). Notably, mining the allelic diversity of these candidate genes within the  
495 larger Barley1K GWAS panel (Hubner et al., 2009) provides further support to their  
496 role in the manifestation of the rhythmicity of the clock output, and its plasticity under  
497 high temperature. For example, the *frp2.1* region was also found in association with  
498 period under HT in the larger B1K panel (Manuscript in preparation).

499 It may well be that implementation of two-dimensional QTL studies in larger  
500 populations will validate the observed cytonuclear interactions (Fig. 6; Fig. S2)  
501 however, it will require a larger scale of Barley1K chloroplast sequencing. These *in*  
502 *silico* identified interactions between candidate loci can then be further verified in *in-*  
503 *vivo* interaction studies that would expand our knowledge of the circadian clock  
504 network and its role in heat sensing and plant responses.

505

506 *The potential of ancestor plasmotype and cytonuclear diversity for crop improvement*

507       The potential of plasmotype diversity for breeding better adapted barley could  
508 be considered from the perspective of several important traits relevant to adaptation to  
509 different environments. Based on the reciprocal hybrids and cytelines, our results  
510 clearly show that flowering time is perhaps the trait most affected by plasmotype  
511 diversity. For example, the flowering of cytoline Noga<sup>03</sup> under HT is not significantly  
512 delayed as compared to the cultivated Noga reference, which is flowering more than  
513 two weeks later under the same conditions (Fig. 7e). This robustness includes reduced  
514 effects of the heat on the reproductive output (Fig. 7h). While these plasmotype alleles  
515 bear the potential to increase crop fitness and broaden the environment in which we  
516 can grow a major crop plant, the cytonuclear interactions are as important to consider.  
517 The mutual conditioned effects of nucleotype and plasmotype QTL (Fig. 6) indicate  
518 that a more extensive genetic infrastructure is required to capture both types of wild  
519 alleles in a cultivated genetic background in order to allow field-testing. The current  
520 multi-parent populations in cereals and barley do not include cytonuclear interactions  
521 segregation (Schnaithmann et al., 2014; Maurer et al., 2015; Novakazi et al., 2020).  
522 Therefore, we recently developed a barley interspecific cytonuclear multi-parent  
523 population (CMPP) with the goal of studying CNI and its utility for breeding and for  
524 testing pleiotropic effects on clock rhythmicity and thermal plasticity.

525

526 **CONCLUSIONS**

527       The ability to test clock phenotypes on the same populations that grow in the  
528 field and identify the underlying genetics is key to understanding the relationships  
529 between important plant traits and circadian clock mechanisms. (here, and reviewed in  
530 Panter et al., 2019). The low occurrence of significant correlations between clock and  
531 fitness traits yet the existence of significant pleiotropic QTLs (Prusty et al., 2021)  
532 highlight the complex nature of circadian clock rhythmicity and yield traits. Several  
533 studies show the effect of clock gene mutants on crop behavior in natural and  
534 agricultural environments (Izawa et al., 2011; Bendix et al., 2015). Here, we show that  
535 accounting for plasmotype diversity, which modulates the plasticity of clock output,  
536 has the potential to confer yield robustness under adverse thermal conditions  
537 Pinpointing the underlying pleiotropic genes is a key to further unravelling the

538 interplay between core and output clock pathways, which may work in both directions  
539 through mechanisms yet to be discovered.

540

## 541 **MATERIALS AND METHODS**

### 542 *Plant material*

543 The source for the ASHER and diallel populations described in this study are barley  
544 accessions (*Hordeum vulgare* ssp. *spontaneum*) that we selected from the Barley1K  
545 collection in Israel to represent the different genetic clades (Hubner et al., 2009). In  
546 addition, few lines are from the IPK collection (Maurer et al., 2015). Included also in  
547 the diallel and as cultivated background for making cytelines is the *H. vulgare*  
548 cultivar cv. Noga which is the leading barley line in Israel. The wild accessions are  
549 from Yerucham (B1K-02-02), Michmoret (B1K-03-09), Ein Prat (B1K-04-04),  
550 Neomi (B1K-05-07), Ashqelon (B1K-09-07), Mount Arbel (B1K-29-13), Mount  
551 Harif (B1K-33-09), Jordan Canal (B1K-42-16), Mount Eitan (B1K-49-19), Mount  
552 Hermon (B1K-50-04), Kisalon, Israel (HID386), Turkey (HID357) and Iran  
553 (HID249). The ASHER is an F3 DH population generated from two reciprocal  
554 hybrids between Ashkelon (B1K-09-07) and Mount Hermon (B1K-50-04) and we  
555 described it in detail earlier (Bdolach et al., 2019b). The diallel is a reciprocal cross  
556 scheme between 11 wild accessions (from the B1K and HID386) and Noga that were  
557 intercrossed on each other to create a full set of hybrid pairs that differ in their  
558 plasmotypes. To generate the cytelines in the background of cultivar Noga we  
559 continued with the F1 hybrids that carry the wild plasmotypes and kept backcrossing  
560 it to Noga as male for several generations. As an example, Noga<sup>02</sup> is a cytoline that  
561 carry the plasmotype of B1K-02-02 after we performed five backcrosses followed by  
562 three generations of selfing to achieve BC<sub>5</sub>S<sub>3</sub> line. More cytelines are Noga<sup>03</sup>, BC<sub>5</sub>S<sub>2</sub>  
563 of Noga x B1K-03-09 cross; Noga<sup>09</sup>, BC<sub>5</sub>S<sub>2</sub> of Noga x B1K-09-07 cross; Noga<sup>249</sup>,  
564 BC<sub>4</sub>S<sub>2</sub> of Noga x HID249 cross; Noga<sup>29</sup>, BC<sub>5</sub>S<sub>3</sub> of Noga x B1K-29-13 cross; Noga<sup>386</sup>,  
565 BC<sub>3</sub>S<sub>2</sub> of Noga x HID386 cross, and Noga<sup>50</sup>, BC<sub>3</sub>S<sub>2</sub> of Noga x B1K-50-04 cross.

566

### 567 *Growth and phenotyping.*

568 We conducted the net house experiments in the Agricultural Research Organization -  
569 Volcani (ARO) Center, Israel. We sowed the different lines in germination trays and  
570 at the 3-leaf stage transplanted the seedlings in randomized block design into troughs  
571 measuring 0.4 × 0.3 m (Mapal Horticulture Trough System, Merom Golan, Israel). A

572 trough contained two rows of plants and the soil was composed of two layers of  
573 volcanic soil (4–20 type of rough soil topped by a finer Odem193 type; Toof Merom  
574 Golan, Merom Golan, Israel). We applied irrigation and fertilization using a drip  
575 system (2L per hour, every 30 cm) four times a day for 10 minutes. Due to the  
576 sensitivity of wild barley to day-length conditions, we preferred to achieve mild  
577 higher temperature conditions by warming the nethouse rather than late sowing  
578 conducted for example for tomato (Bineau et al., 2021). We achieved high  
579 temperature treatment (HT) by covering half of the insect-proof with nylons and  
580 heating with electric heaters (3KW; Galon fans and pumps Ltd, Nehora, Israel). The  
581 second half of the nethouse remained with only net walls and ventilated with a large  
582 fan to take out the hot air for the ambient temperature treatment (AT). The thermal  
583 differences between HT and AT is depicted in fig. S1, with a mean increase of 3.9 °C  
584 and 2.8 °C during day and night time and maximum delta of mean 7.5 °C between AT  
585 to HT.

586 We measured circadian clock amplitude and period in high-throughput  
587 SensyPAM (SensyTIV, Aviell, Israel) custom-designed to allow Fluorescence  
588 measurements (Bdolach et al., 2019) under optimal temperature of 22°C (OT) or high  
589 temperature of 32°C (HT). We calculated the Fluorescence parameters NPQ<sub>ss</sub>,  
590 Fv/Fm, Fv/Fm<sub>ss</sub> and Rfd as average of all three days measurements under continuous  
591 light (Dakhiya et al., 2017). We calculated the period and amplitude of the circadian  
592 clock output using the BioDare platform (<https://biodare2.ed.ac.uk>) (Zielinski et al.,  
593 2014).

594 We obtained the life history traits phenotype for the ASHER population lines  
595 during winter of 2017-2018 in six replicates per treatment. The reciprocal diallel  
596 population were grown during winter of 2019-2020 and the cytolines experiment was  
597 conducted in winter of 2020-2021. We began phenotyping by measuring Tiller height  
598 (TH), that is the length of the longest tiller from ground level to the last fully  
599 expended leaf in that tiller. Tiller number (TN) is the number of tillers per plant and it  
600 was determined about one month after transplanting the plants. TH and TN were  
601 measured once (\_1) or twice (\_2) with 14 days apart. We calculated TH rate by  
602 suspending TH\_2 with TH\_1 and dividing with the number of days between these two  
603 measurements. We determined the number of days to flowering (DTF) based on the  
604 date when the first awns appear in the main tiller. During grain filling we measured  
605 five spikes per plant for spike length (SL) and later to obtain SLCV. In addition,

606 during grain filling we measured plant height (PH) from ground to the start of the  
607 toolset spike. We then cached the five and whole spikes of each plant in separate  
608 paper and nylon bags, respectively. Plants were left to dry for several weeks after  
609 irrigation was terminated. We harvested dry plants by cutting at soil level and placing  
610 them in the nylon bags. Weight of the nylon bag with the plant is the total dry matter  
611 (TDM). We collected dispersal units from bag and weighted them. We calculated  
612 average spike dry weight (ASDW) based on weighing the five spikes that we cached  
613 in the paper bag. We then summed the weight of spikes (dispersal units) in the plastic  
614 and paper bags to obtain spikes dry weight (SpDW). Vegetative dry weight (VDW) is  
615 the reduction of SpDW from TDM. In the cytolines experiment, we also counted  
616 Spikes per plant (SPP) and the ASDW based on those spikes.

617

#### 618 *Genome-wide and cytonuclear interaction QTL analysis*

619 The description of the ASHER SNP genotyping and QTL analysis for the different  
620 traits is described in Bdolach et al., 2019. The genome-wide QTL interaction analysis  
621 of the DH population for different traits carried out using inclusive composite interval  
622 mapping (ICIM; (Li et al., 2007)) with the IciMapping V4.1 (Meng et al., 2015)  
623 software package. IciM 4.1 uses an improved algorithm of composite interval  
624 mapping for bi-parental population. The QTL by environment interaction (QxE) was  
625 also assessed with the inclusive composite interval mapping (ICIM) method, using the  
626 MET function of the software QTL IciMapping 4.1 (Li et al., 2007, Meng et al.,  
627 2015). Illumina paired-end libraries (375 bp insert size) of total barley DNA from  
628 mature leaves were used to sequence the plastid genomes of the parental lines as  
629 previously described (Bdolach et al., 2019).

630

#### 631 *Statistical analysis*

632 The JMP version 14.0 statistical package (SAS Institute, Cary, NC, USA) was used  
633 for statistical analyses. Student's t-Tests between treatments, plasmotypes and alleles  
634 were conducted using the 'Fit Y by X' function. A factorial model was employed for  
635 the analysis of variance (ANOVA, Fig. 6), using 'Fit model', with temperature  
636 treatment and allelic state as fixed effects.

#### 637 *Candidate genes in the *frp 2.1* and *amp7.1**

638 We downloaded the list of high confidence gene in the QTL intervals (*frp2.1*,  
639 Chromosome 2:698,875,542-702,308,910; *amp7.1*, Chromosome 7: 498,472,330-  
640 510,903,725) from BarleX database with Morex V1 annotation and tested them for  
641 interaction with core clock gene in barley. For this, we retrieved the list of genes  
642 involved in circadian pathway in *Hordeum vulgare* from plant reactome  
643 (<https://plantreactome.gramene.org>). Plant reactome is the Gramene's pathway  
644 knowledgebase that uses *Oryza sativa* as a reference species for manual curation of  
645 the pathway and extends pathway knowledge for other 82 plant species via gene-  
646 orthology projection (Naithani et al., 2020). BarleyNET inferred the co-functional  
647 links between barley genes by analyzing various types of omics data obtained from  
648 cultivated barley, as well as three other plant species (*Arabidopsis thaliana*, *Zea mays*,  
649 and *Oryza sativa*) (Lee et al., 2020). In the BarleyNET, under the pathway centric  
650 search function, the known circadian clock genes were used as the guide gene to  
651 identify genes by 'guilt-by-association' method. These genes were prioritized by total  
652 edge weight score (sum of log likelihood score) to the guide gene set.

653

#### 654 ACKNOWLEDGEMENTS

655 We thank Dr Stephan Greiner (Max-Planck-Institut für Molekulare  
656 Pflanzenphysiologie, Golm, Germany) for sharing barley chloroplasts sequence data.  
657 The authors are grateful to Royi Levav Oded Anner and Daniel Shamir (SensyTIV,  
658 Amiel, Israel) for their assistance in maintaining the SensyPAM as a system for  
659 measuring circadian rhythms. We also wish to thanks the technical assistance of  
660 laboratory member Avital Beery and Orit Amir-Segev.

661

#### 662 LIST OF AUTHOR CONTRIBUTIONS

663 E.B and E.F. designed the experiments, collected, analyzed and interpreted  
664 data, and wrote the manuscript. E.B., M.R.P. K.K., and L.D.T were involved in the  
665 data analyses, their interpretation and in writing the manuscript.

666

667 **Table 1**

| Trait        | Type         | male parent Prob > F | male parent PVE [%] | Plasmotype Prob > F | Plasmotype PVE [%] |
|--------------|--------------|----------------------|---------------------|---------------------|--------------------|
| TH_1_AT      | Growth       | 0.0068               | 24 %                | <.0001              | 41 %               |
| TH_1_HT      | Growth       | <.0001               | 37 %                | <.0001              | 36 %               |
| TH_2_AT      | Growth       | <.0001               | 34 %                | <.0001              | 38 %               |
| TH_2_HT      | Growth       | <.0001               | 36 %                | <.0001              | 46 %               |
| TH rate_AT   | Growth       | <.0001               | 34 %                | 0.0002              | 32 %               |
| TH rate_HT   | Growth       | <.0001               | 33 %                | <.0001              | 47 %               |
| ASDW_AT      | Reproductive | <.0001               | 43 %                | <.0001              | 35 %               |
| ASDW_HT      | Reproductive | <.0001               | 41 %                | 0.0037              | 27 %               |
| DTF_AT       | Reproductive | <.0001               | 43 %                | 0.0002              | 32 %               |
| DTF_HT       | Reproductive | <.0001               | 37 %                | 0.0008              | 28 %               |
| PH_AT        | Growth       | 0.0007               | 30 %                | <.0001              | 39 %               |
| PH_HT        | Growth       | 0.0266               | 21                  | 0.0001              | 33 %               |
| SL_AT        | Reproductive | 0.0006               | 31 %                | <.0001              | 42 %               |
| SL_HT        | Reproductive | 0.0111               | 23 %                | 0.0007              | 30 %               |
| SLCV_AT      | Reproductive | 0.0215               | 22 %                | 0.0912              | 18 %               |
| SLCV_HT      | Reproductive | 0.2076               | 15 %                | 0.1434              | 16 %               |
| TDM_AT       | Reproductive | 0.0879               | 18 %                | <.0001              | 35 %               |
| TDM_HT       | Reproductive | 0.3174               | 13 %                | 0.0007              | 29 %               |
| VDW_AT       | Growth       | 0.1108               | 17 %                | <.0001              | 35 %               |
| VDW_HT       | Growth       | 0.1965               | 15 %                | 0.0003              | 31 %               |
| SpDW_AT      | Reproductive | 0.028                | 21 %                | <.0001              | 35 %               |
| SpDW_HT      | Reproductive | 0.0566               | 19 %                | 0.0094              | 23 %               |
| Amplitude_OT | Clock        | 0.1819               | 24 %                | 0.1325              | 26 %               |
| Amplitude_HT | Clock        | 0.2046               | 23 %                | 0.136               | 26 %               |
| Period_OT    | Clock        | 0.2694               | 22 %                | 0.387               | 19 %               |
| Period_HT    | Clock        | 0.2715               | 22 %                | 0.0184              | 34 %               |
| dAMP         | Clock        | 0.1892               | 24 %                | 0.0369              | 32 %               |
| dPeriod      | Clock        | 0.7274               | 13 %                | 0.3768              | 20 %               |
| Fv/Fm_OT     | Chl F        | 0.736                | 14 %                | 0.2647              | 23 %               |
| Fv/Fm_HT     | Chl F        | 0.4621               | 19 %                | 0.3934              | 20 %               |
| Fv/Fmlss_OT  | Chl F        | 0.9231               | 09 %                | 0.0834              | 29 %               |
| Fv/Fmlss_HT  | Chl F        | 0.8984               | 10 %                | 0.2307              | 24 %               |
| NPQlss_OT    | Chl F        | 0.4743               | 18 %                | 0.0386              | 32 %               |
| NPQlss_HT    | Chl F        | 0.1641               | 26 %                | 0.0551              | 31 %               |
| Rfd_OT       | Chl F        | 0.1015               | 28 %                | 0.1697              | 25 %               |
| Rfd_HT       | Chl F        | 0.0414               | 32 %                | 0.0327              | 33 %               |

668

669

670

671 **Figure 1: Mild increase in temperature has significant effect on plant**  
 672 **performance in the field.** Distribution and box plot of life history traits under  
 673 ambient temperature (AT, black) and high temperature (HT, gray) (see Fig. S1 for



674 differences between AT and HT) for **a)** ASHER DH population and **b)** full-diallel.  
675 Life history traits include Tiller height at two time points and the rate between them,  
676 Average Spike dry weight, Days to flowering (DTF), Spike length (SL), Spikes dry  
677 weight (SpDW), Plant height (PH), Vegetative dry weight (VDW) and Total dry  
678 matter (TDM). For each student's t-test between HT and AT, the p value is depicted  
679 as \*: P<0.05, \*\*: P<0.01 or \*\*\*: P<0.001

680

681 **Figure 2: Thermal plasticity of life history traits is under cytoplasmic control in**  
682 **wild barley.** Reaction norms of life history traits depicting the average responses of  
683 the two parental plasmotypes to mild heat. Differential response between the carriers  
684 of Ashkelon (blue) and Hermon (red) plasmotype for **a)** Days to flowering (DTF), **b)**  
685 Spike length (SL), **c)** Spike length CV (SLCV), **d)** Vegetative dry weight (VDW), **e)**  
686 Total dry matter (TDM) and **f)** Spikes dry weight (SpDW). Levels not connected by  
687 same letter are significantly different in student's t-test (P<0.05).

688

689 **Table 1: One-way ANOVA for plasmotype vs nucleotype effects in the reciprocal**  
690 **diallel population.** Tiller height at two time points and the rate between them, Days  
691 to flowering (DTF), Average Spike dry weight (ASDW), Plant height (PH), Spike  
692 length (SL), spike length CV, Spikes dry weight (SpDW), Total dry matter (TDM)  
693 and Vegetative dry weight (VDW) in the nethouse under ambient temperature (AT)  
694 and high temperature (HT).

695 For clock and Chl F traits: Amplitude, Period, delta Amplitude (dAMP), delta Period  
696 (dPeriod), Fv/Fm, F/Fmlss, NPQlss and Rfd in SensyPAN under optimal temperature  
697 of 22°C (OT) or high temperature of 32°C (HT) and the delta HT-OT.

698

699 **Figure 3: Chlorophyll florescence and circadian clock rhythmicity in barley**  
700 **diallel grown under OT and HT.** Distribution and box plot of clock output  
701 rhythmicity: **a)** Amplitude, and **b)** Period, and for mean chlorophyll florescence traits:  
702 , **c)** Fv/Fm, (**d)** Fv/Fmlss, **e)** NPQlss and **f)** Rfd under optimal temperature (OT,  
703 black) and high temperature (HT, gray) in the reciprocal diallel population. For each  
704 student's t-test, the p value is depicted as \*: P<0.05, \*\*: P<0.01 or \*\*\*: P<0.001. The  
705 means of clock **g)** period and **h)** amplitude under optimal temperature (OT, black) and  
706 high temperature (HT, gray) in SensyPAM for the *H. spontaneum* accessions parental  
707 accessions of the diallel: B1K-02-02 (Yerucham), B1K-03-09 (Michmoret), B1K-04-



708 04 (Ein Prat), B1K-05-07 (Neomi), B1K-09-07 (Ashqelon), B1K-29-13 (Mount  
709 Arbel), B1K-33-09 (Mount Harif), B1K-42-16 (Jordan Canal), B1K-49-19 (Mount  
710 Eitan), B1K-50-04 (Mount Hermon), HID386 (Kisalon, Israel) and the cultivar Noga.

711

712 **Figure 4: Proportion of crosses with significant difference between reciprocal**  
713 **hybrids for phenotypic traits, under OT or AT and HT.** Life history traits include:  
714 Tiller height (TH) and number (TN) at two time points and the rate between them,  
715 Days to flowering (DTF), Average Spike dry weight (ASDW), Plant height (PH),  
716 Spike length (SL), spike length CV (SLCV), Spikes dry weight (SpDW), Total dry  
717 matter (TDM) and Vegetative dry weight (VDW) for plants in the nethouse under  
718 ambient temperature (AT) and high temperature (HT). For clock and Chl F traits:  
719 Amplitude, Period, delta Amplitude (dAMP), delta Period (dPeriod), Fv/Fm, F/Fmlss,  
720 NPQlss and Rfd in SensyPAM under optimal temperature of 22°C (OT) or high  
721 temperature of 32°C (HT) and the delta HT-OT.

722 The mean for each type of traits is depicted: Growth or reproductive traits in the  
723 greenhouse experiment, and clock or Chl F in the SensyPAM.

724

725 **Figure 5: Pleiotropic nucleotide QTL underlying life history traits plasticity.**  
726 **Circos plot depicting loci with significant effects under AT, HT and loci showing**  
727 **GxE interaction with thermal environment. a)** Circos of LOD in the ASHER DH  
728 population for life history traits. From outer to inner lane: Days to flowering (DTF),  
729 Plant height (PH), Spike length (SL), Spikes dry weight (SpDW) and Vegetative dry  
730 weight (VDW) under ambient temperature (AT-yellow), high temperature (HT-red)  
731 and GxE (blue). Reaction norms of *frp2.1* locus with pleiotropic effects on **b)** plant  
732 height (PH) and **c)** Vegetative dry weight (VDW), and of **d)** *amp7.1* for spike length.  
733 Red and blue lines depict mean values of lines homozygous for the Hermon or  
734 Ashkelon alleles, respectively. Levels not connected by same letter are significantly  
735 different in student's t-test ( $P < 0.05$ ).

736

737 **Figure 6: GxGxE interactions between plasmotype and *frp2.1* nuclear QTL**  
738 **under ambient and high temperatures in ASHER DH population.** Cytoplasm by  
739 nuclear (GxG) QTL interaction plots under **a)** ambient (AT) and **b)** high (HT)  
740 temperatures for vegetative DW. Similarly, interaction plots under **c)** ambient (AT)  
741 and **d)** high (HT) temperatures for spikes DW. Plasmotype is depicted in x axis

742 (Ashkelon or Hermon), and red or blue lines illustrate the Hermon or Ashkelon alleles  
743 in *frp2.1*. Reaction norms of the different Plasmotype-*frp2.1* locus-combinations  
744 between AT and HT for **e**) vegetative DW, and **f**) Spikes DW. Green, Ashkelon  
745 (Plasmotype)-Hermon (*frp2.1*); Purple, Ashkelon-Ashkelon; Brown, Hermon-  
746 Ashkelon; Orange, Hermon-Hermon.

747

748 **Figure 7: Phenotypic variation and thermal plasticity of cytolines for clock**  
749 **rhythmicity, Chl F, and life history traits.** Bar plots for the delta between high  
750 temperature (HT, 32°C) and optimal temperature (OT, 22°C) (HT-OT/AT) for  
751 cytolines with wild barley plasmotype in the background of cultivated barley  
752 phenotype. For clock traits in the SensyPAM under HT and OT: **a**) period, **b**),  
753 amplitude, **b**) NPQ<sub>ss</sub>, and **d**) F<sub>v</sub>/F<sub>m</sub>. For life history traits under AT and HT: **e**) days  
754 to flowering (DTF), **f**) plant height (PH), **g**) spikes per plant (SPP), **h**) spikes dry  
755 weight (SpDW), **i**) vegetative dry weight (VDW), **j**) and spike length (SL). The  
756 Students's t test p value is depicted as \*, P<0.05; \*\*, P<0.01; or \*\*\*, P<0.001.

757

758 **Figure 8: Genetic association between chloroplast haplotypes (right) and**  
759 **different clock and fitness traits (X-axis).** Blue and red bars represent the -Log<sub>10</sub>P  
760 for Students's t test between haplogroups among the hybrids under OT/AT and HT,  
761 respectively. The -LogP is calculated and corrected for multiple testing and the  
762 threshold for P<0.05 (-Log<sub>10</sub>=2.3) is indicated with horizontal orange line.

763

764

765

766 **Table S1:** Pearson correlations (r) between all phenotypic traits under optimal  
767 temperature (OT, 22°C) and high temperature (HT, 32°C) in the reciprocal diallel  
768 population.

769

770 Table S2: Chloroplast genes sequencing of the *H. spontaneum* accessions parental  
771 accessions of the diallel: B1K-02-02 (Yerucham), B1K-03-09 (Michmoret), B1K-04-  
772 04 (Ein Prat), B1K-05-07 (Neomi), B1K-09-07 (Ashqelon), B1K-29-13 (Mount  
773 Arbel), B1K-33-09 (Mount Harif), B1K-42-16 (Jordan Canal), B1K-49-19 (Mount  
774 Eitan), B1K-50-04 (Mount Hermon), HID386 (Kisalon, Israel) and the cultivar Noga.

775

776 **Table S3:** Barley circadian pathway genes from the plant reactome  
777 (<https://plantreactome.gramene.org>)

778

779 **Table S4:** List of the interacting genes to the guide core circadian genes from  
780 BarleyNET pathway centric search

781

782 **Table S5:** High confidence candidate genes in *amp7.1* chromosomal region

783

784 **Table S6:** High confidence candidate genes in *frp2.1* chromosomal region

785

786 **Figure S1:** Mean daily temperature in the nethouse under ambient temperature (AT),  
787 high temperature (HT) and the delta between them (HT-AT). **a)** ASHER, **b)** diallel  
788 and **c)** cytolines experiments. Blue and orange lines represent the average day of  
789 flowering under AT and HT, respectively.

790

791 **Figure S2: GxGxE interactions between *amp7.1* and plasmotype under optimal**  
792 **and ambient temperatures.** Cytoplasm by nuclear (GxG) QTL interaction plots  
793 under **a)** ambient (AT) and **b)** high (HT) temperatures for Days to flowering.  
794 Plasmotype is depicted in X axis (Ashkelon or Hermon), and red or blue lines  
795 illustrate the Hermon or Ashkelon alleles in *amp7.1*. Levels not connected by same  
796 letter are significantly different in student's t-test. **c)** Reaction norms of the different  
797 combinations Plasmotype-*amp7.1* loci between optimal temperature (OT, 22°C) and  
798 high temperature (HT, 32°C). Green, Ashkelon (Plasmotype)-Hermon (*frp2.1*);  
799 Purple, Ashkelon-Ashkelon; Brown, Hermon-Ashkelon; Orange, Hermon-Hermon

800

801 **Figure S3: Clock rhythmicity and Chl F variation between cytolines under OT**  
802 **and HT.** Cytolines with wild barley cytoplasm in the background of cultivated barley  
803 grown under optimal temperature (OT, 22°C) and high temperature (HT, 32°C). Bar  
804 plots with SE for the cytolines for **a)** period, **b)** amplitude, **c)** NPQ<sub>ss</sub> and **d)** Fv/Fm.  
805 Different letters depict significant difference in a Tukey-Kramer test.

806

807 **Figure S4: No different between cytolines for life history traits under AT and**  
808 **HT.** Cytolines with wild barley cytoplasm in the background of cultivated barley  
809 grown under ambient temperature (AT) and high temperature (HT). Bar plots and SE  
810 for **a)** days to flowering, **b)** plant height, **c)** spikes per plant, **d)** spikes dry weight, **e)**

811 vegetative dry weight and **f**) spike length. Different letters depict significant  
812 difference in Tukey-Kramer test.  
813  
814  
815

816

817



## a) ASHER

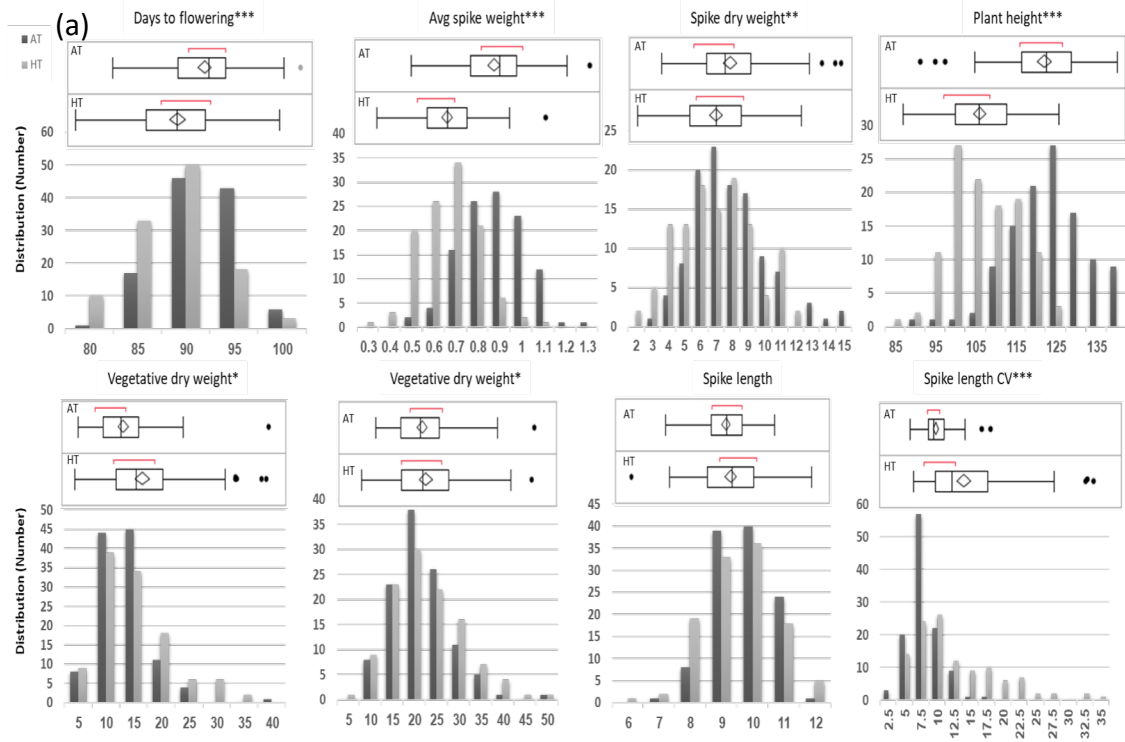

## b) DIALLEL

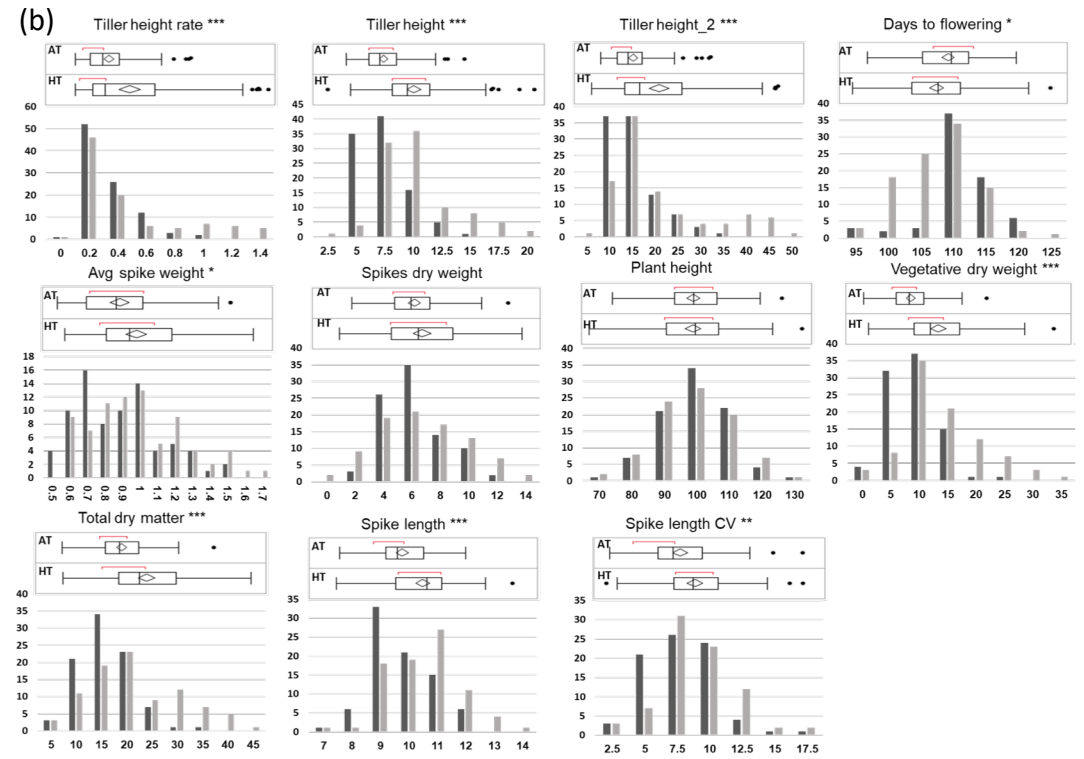

Figure 1

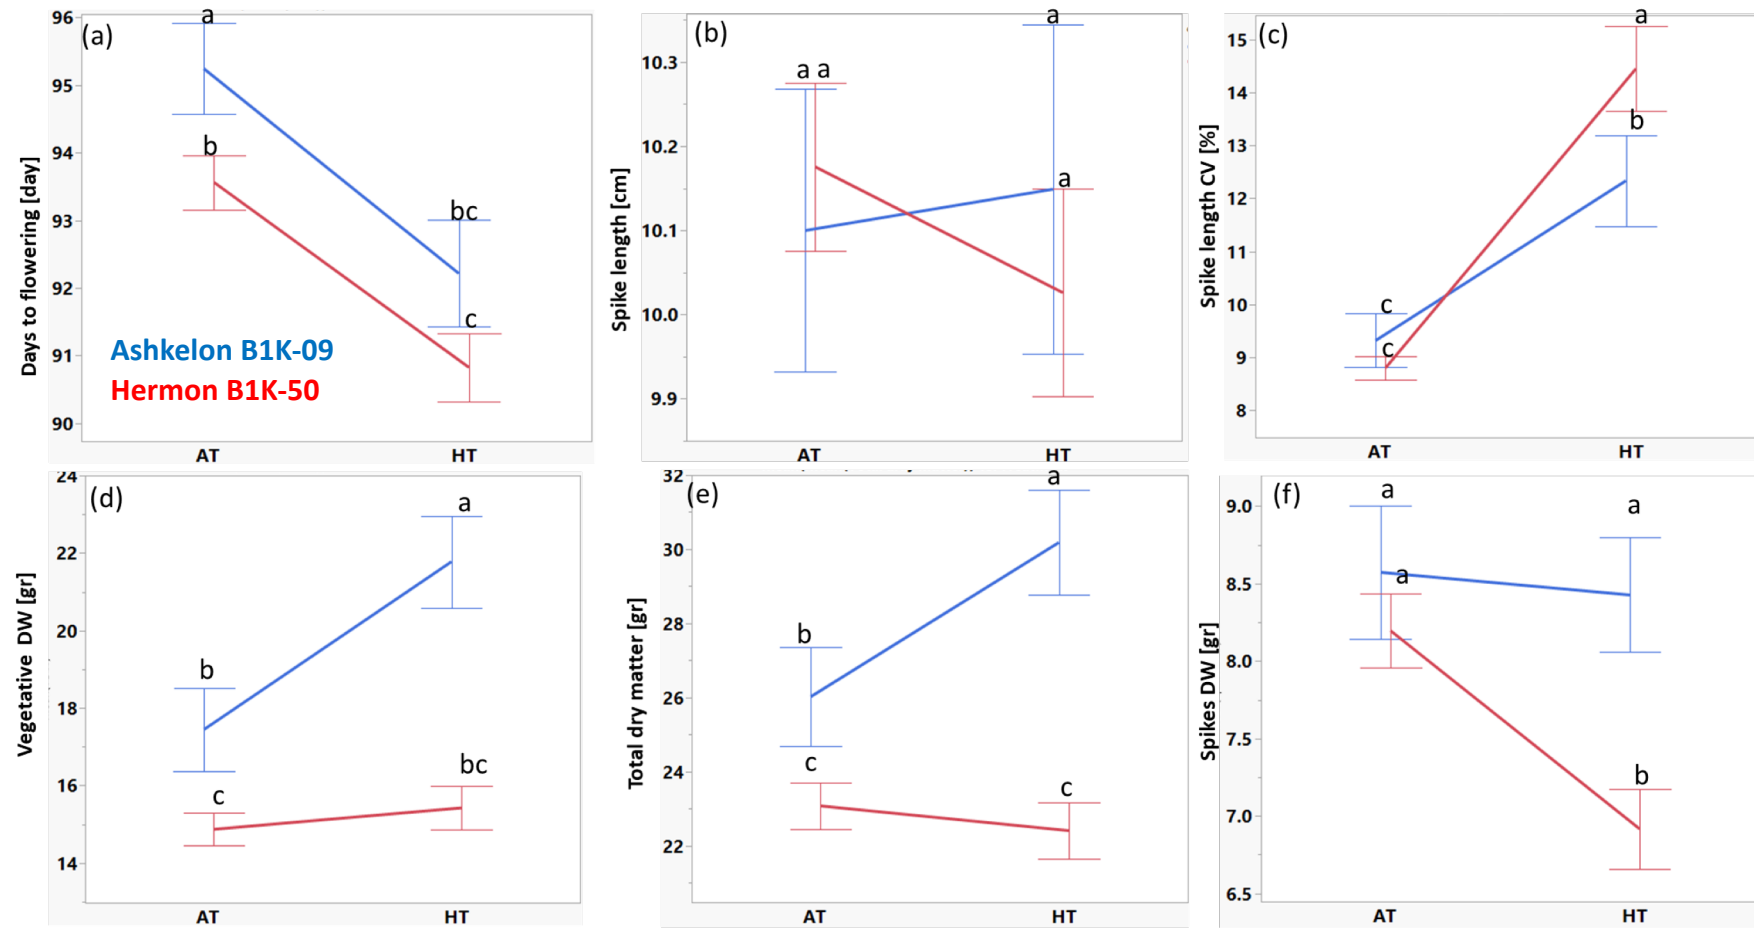

**Figure 2**





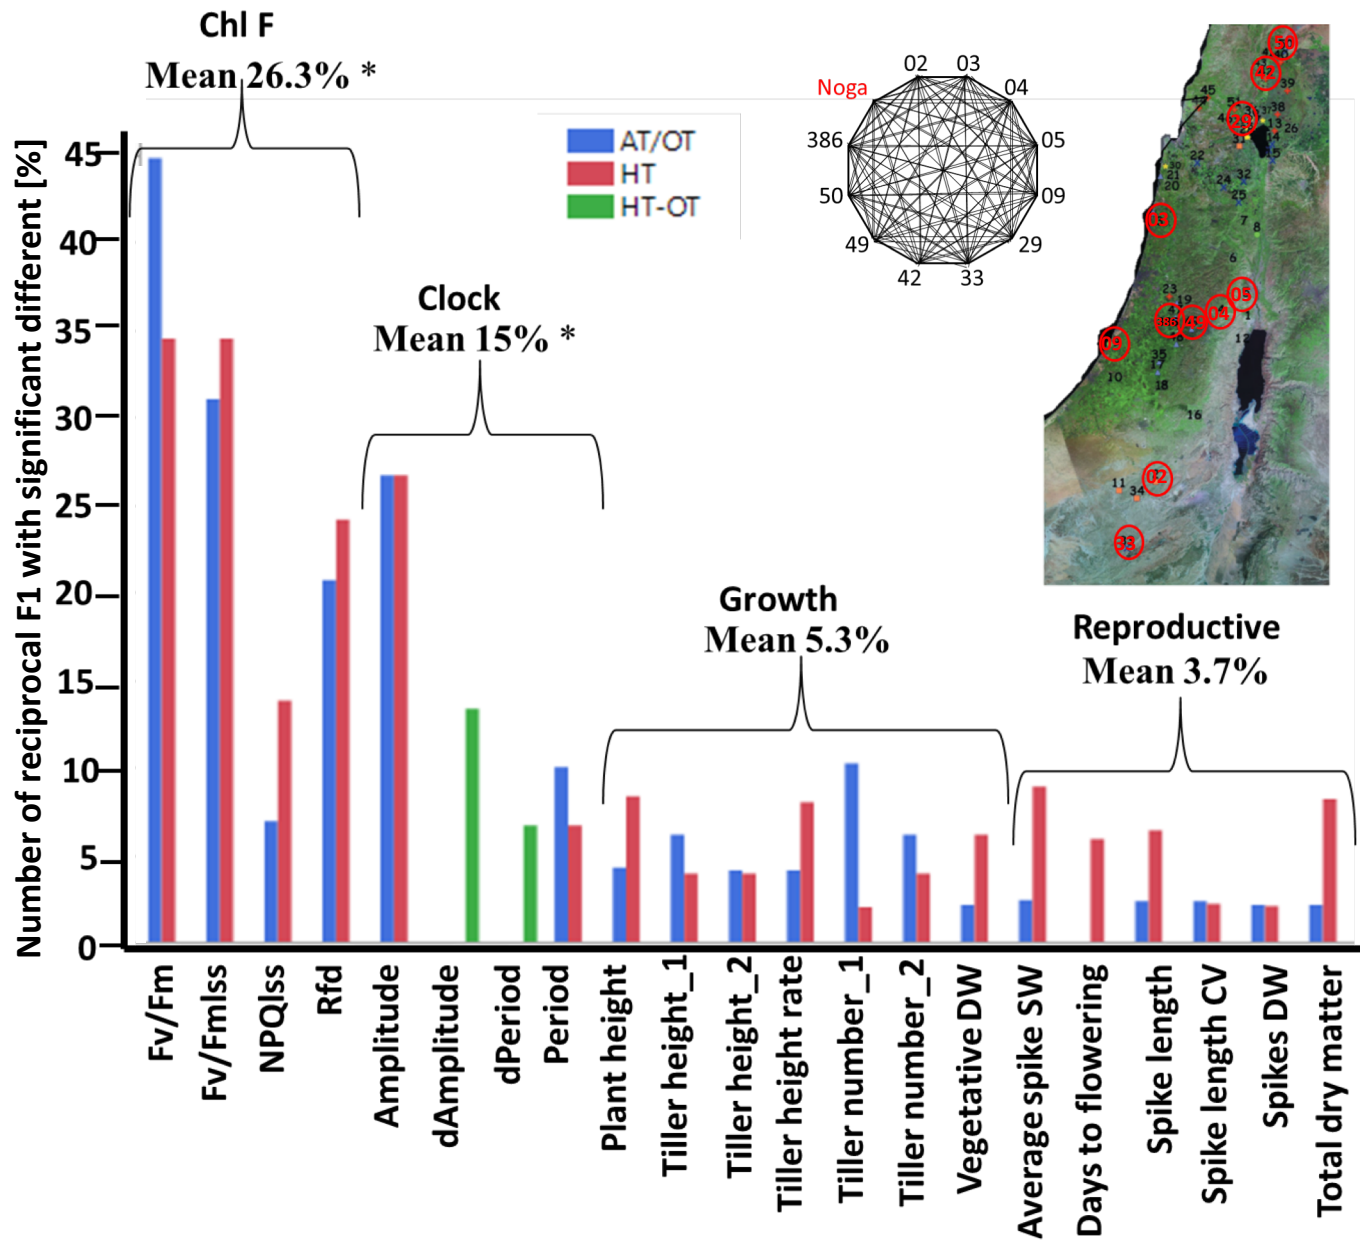

Figure 4

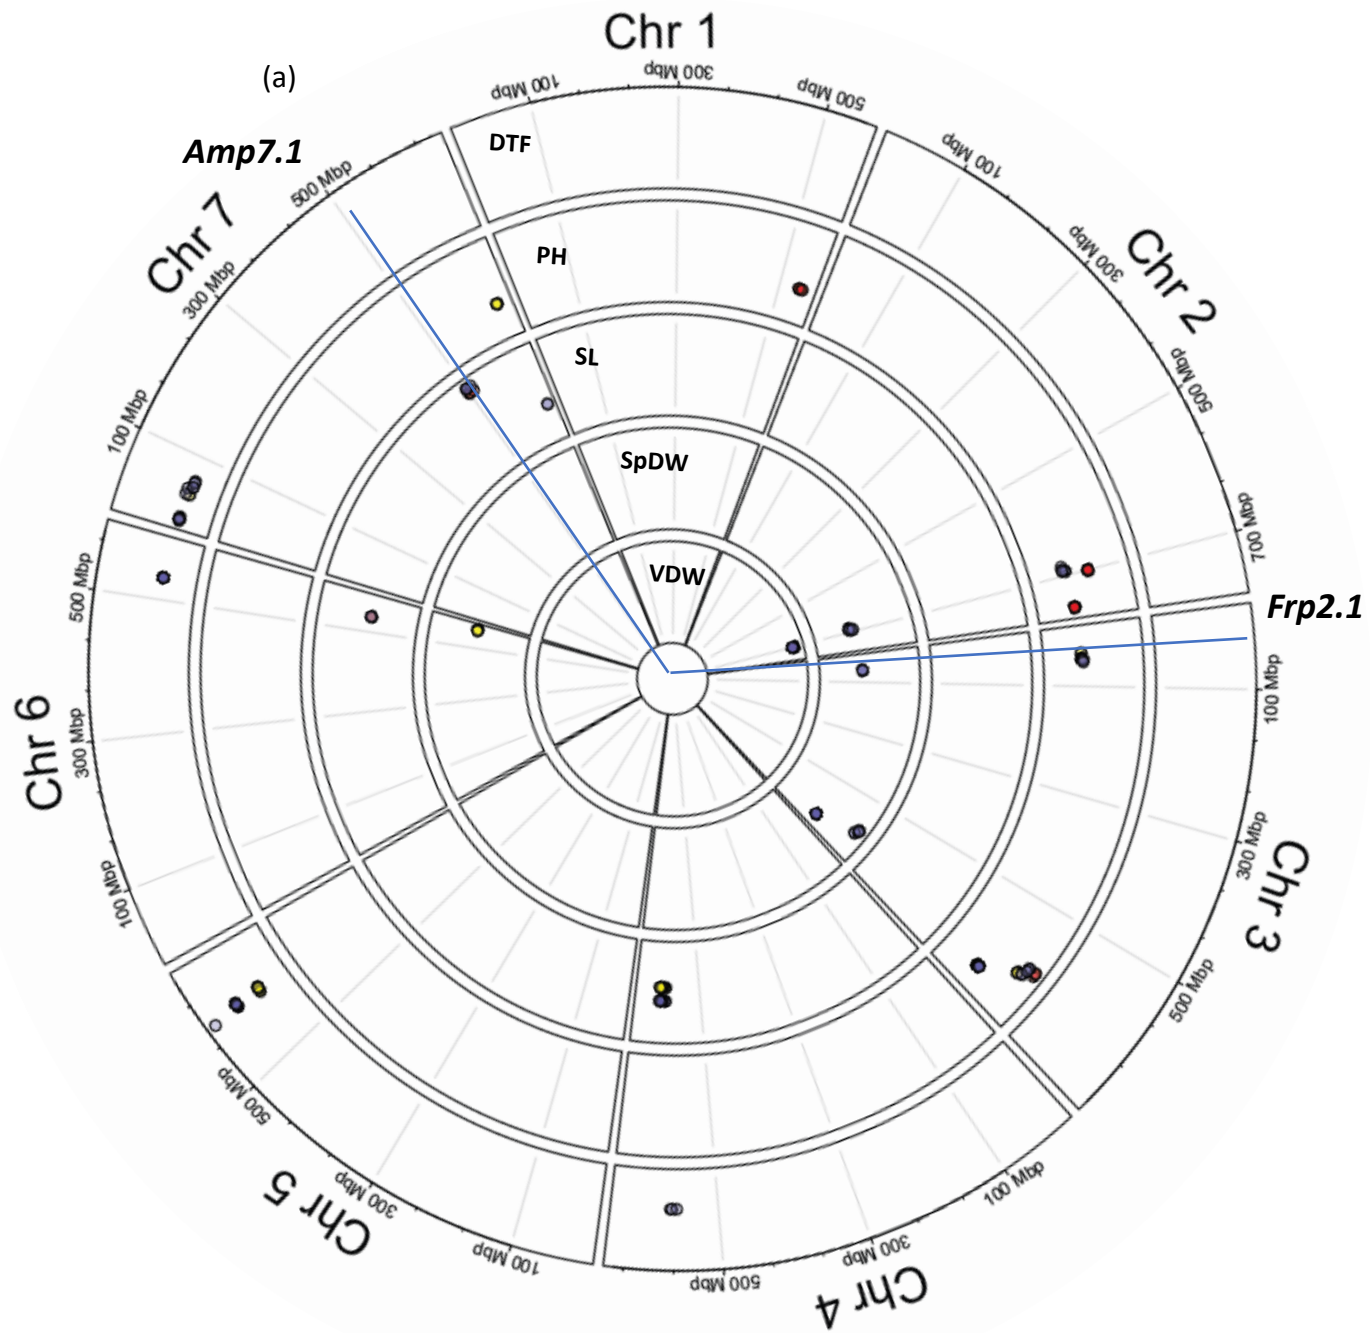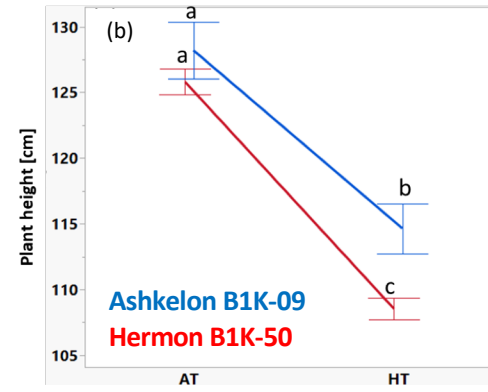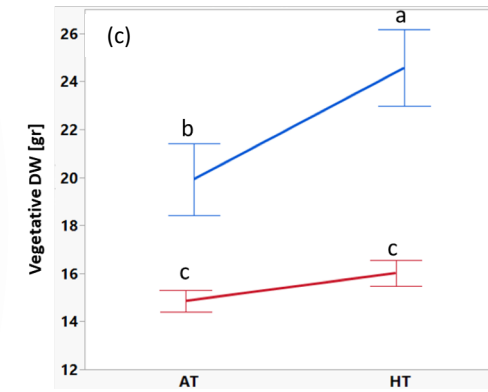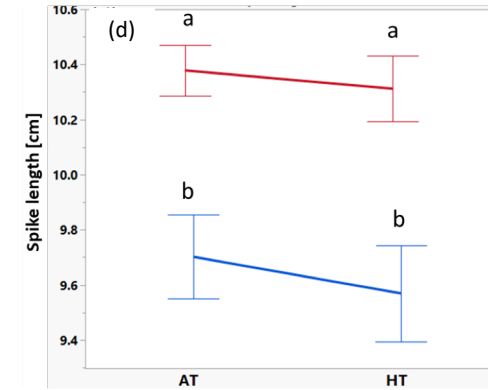

Figure 5

**Figure 6**

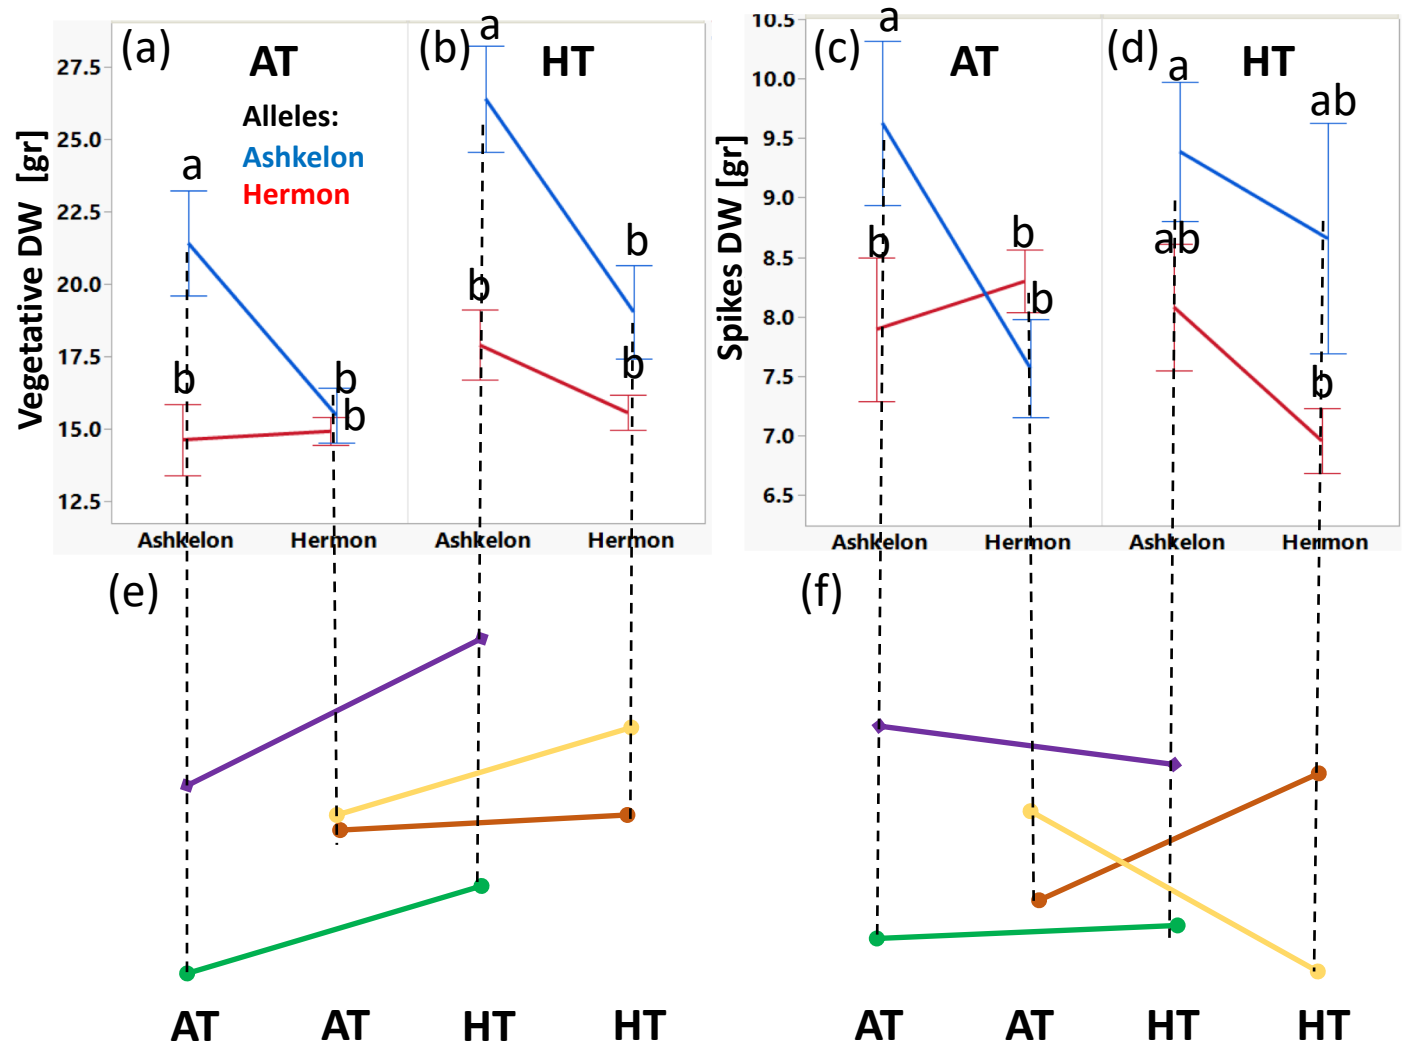

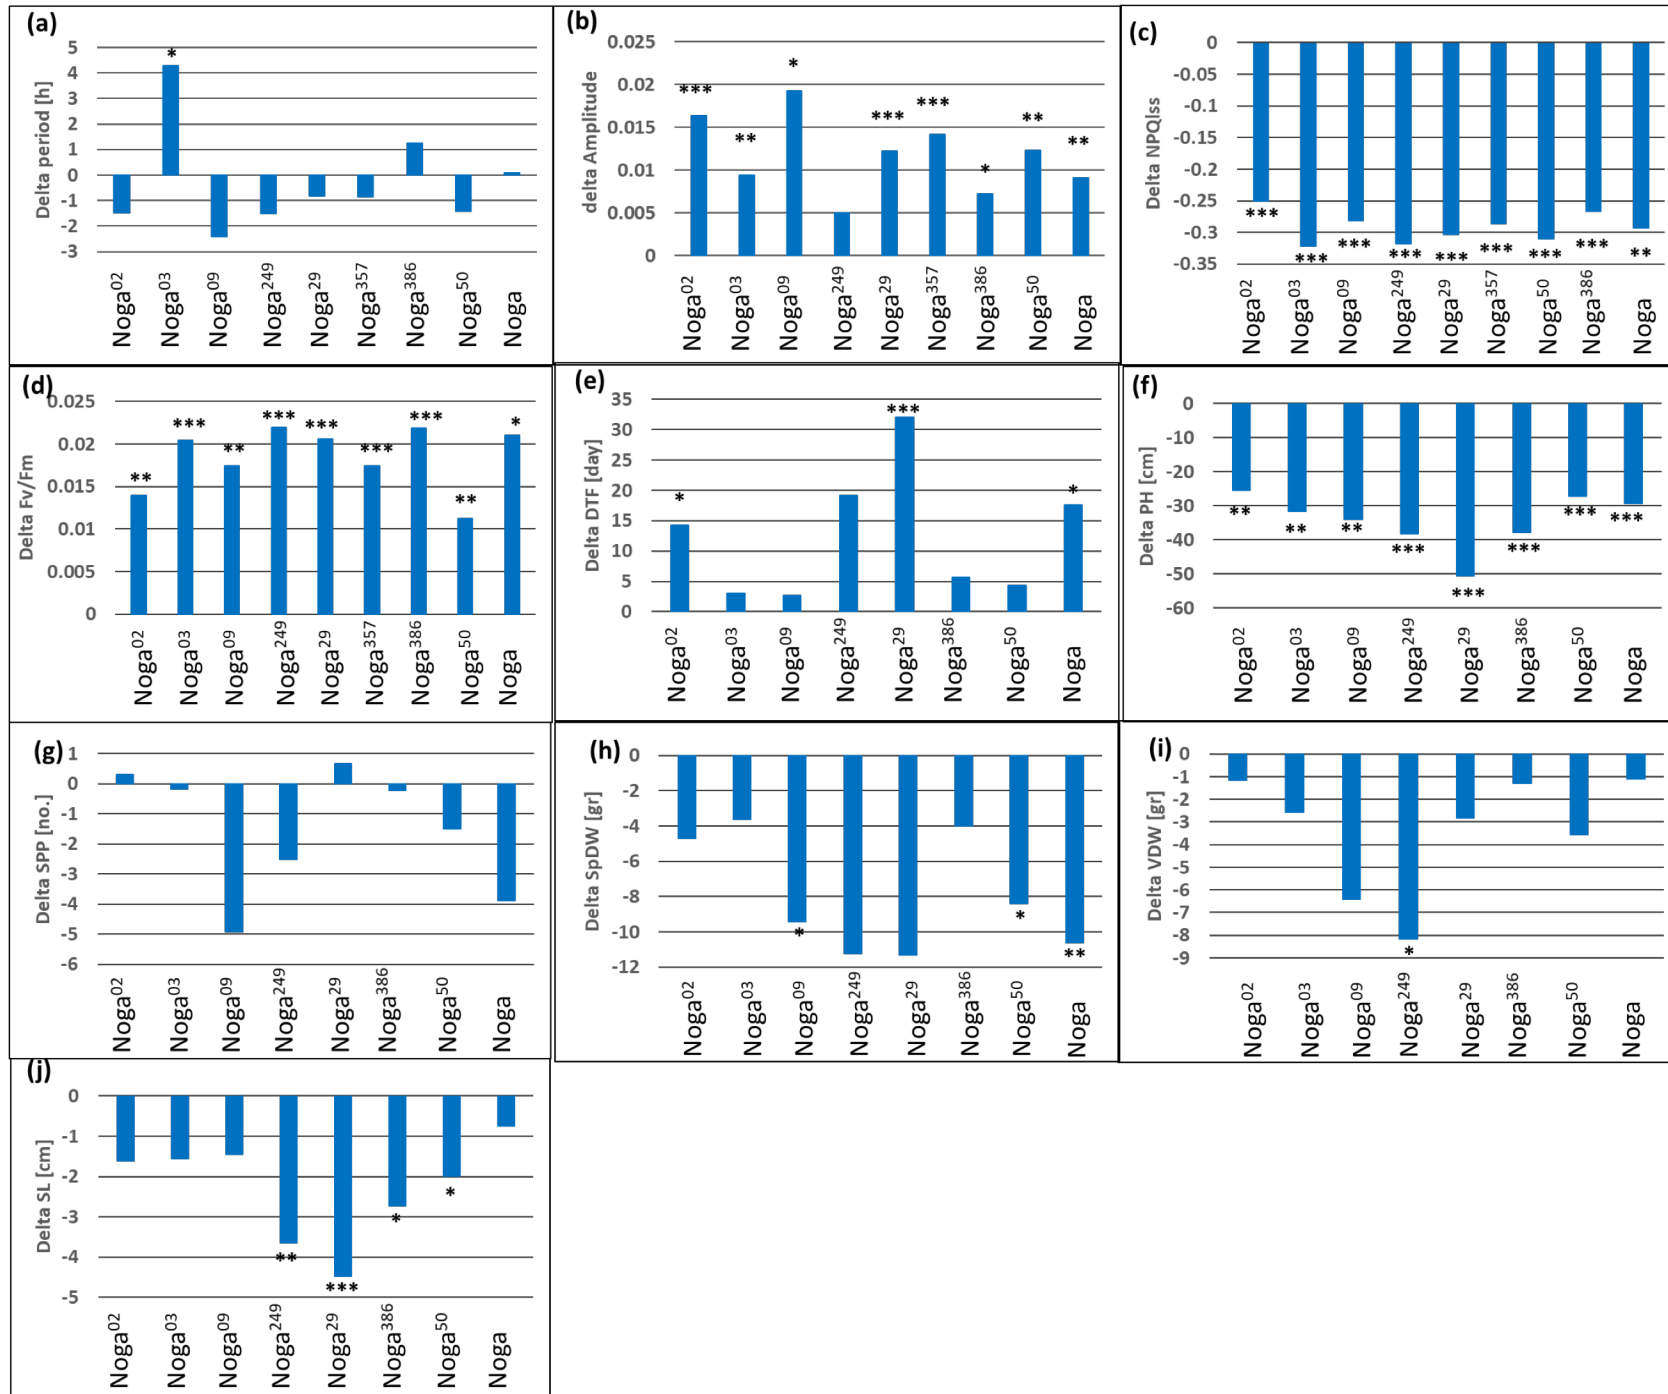

**Figure 7**



## Parsed Citations

- Andronis C, Barak S, Knowles SM, Sugano S, Tobin EM (2008) The Clock Protein CCA1 and the bZIP Transcription Factor HY5 Physically Interact to Regulate Gene Expression in Arabidopsis. Mol Plant 1: 58–67**  
Google Scholar: [Author Only](#) [Title Only](#) [Author and Title](#)
- Bdolach E, Prusty MR, Faigenboim-Doron A, Filichkin T, Helgerson L, Schmid KJ, Greiner S, Fridman E (2019) Thermal plasticity of the circadian clock is under nuclear and cytoplasmic control in wild barley. Plant Cell Environ. doi: 10.1111/pce.13606**  
Google Scholar: [Author Only](#) [Title Only](#) [Author and Title](#)
- Bendix C, Marshall CM, Harmon FG (2015) Circadian clock genes universally control key agricultural traits. Mol Plant 8: 1135–1152**  
Google Scholar: [Author Only](#) [Title Only](#) [Author and Title](#)
- Bineau E, Diouf I, Carretero Y, Duboscq R, Bitton F, Djari A, Zouine M, Causse M (2021) Genetic diversity of tomato response to heat stress at the QTL and transcriptome levels. Plant J. doi: 10.1111/tbj.15379**  
Google Scholar: [Author Only](#) [Title Only](#) [Author and Title](#)
- Chen Y, Lübberstedt T (2010) Molecular basis of trait correlations. Trends Plant Sci 15: 454–461**  
Google Scholar: [Author Only](#) [Title Only](#) [Author and Title](#)
- Dakhiya Y, Hussien D, Fridman E, Kiflawi M, Green R (2017) Correlations between circadian rhythms and growth in challenging environments. Plant Physiol 173: 1724–1734**  
Google Scholar: [Author Only](#) [Title Only](#) [Author and Title](#)
- Ekiz H, Kiral AS, Akçin A, Simsek L (1998) Cytoplasmic effects on quality traits of bread wheat (*Triticum aestivum* L.). Euphytica 100: 189–196**  
Google Scholar: [Author Only](#) [Title Only](#) [Author and Title](#)
- Flaconer DS, Mackay TF. (1996) Introduction to Quantitative Genetics, 4th ed. Pearson Education Limited, Harlow, United Kingdom**  
Google Scholar: [Author Only](#) [Title Only](#) [Author and Title](#)
- Flood PJ, Theeuwes TPJM, Schneeberger K, Keizer P, Kruijer W, Severing E, Kouklas E, Hageman JA, Wijffes R, Calvo-Baltanas V, et al (2020) Reciprocal cybrids reveal how organellar genomes affect plant phenotypes. Nat Plants 6: 13–21**  
Google Scholar: [Author Only](#) [Title Only](#) [Author and Title](#)
- Frei U, Peiretti EG, Wenzel G (2003) Significance of cytoplasmic DNA in plant breeding. In J Janick, ed, Plant Breed. Rev. John Wiley & Sons, Inc., Hoboken, pp 175–210**  
Google Scholar: [Author Only](#) [Title Only](#) [Author and Title](#)
- Frei U, Peiretti EG, Wenzel G (2010) Significance of Cytoplasmic DNA in Plant Breeding. Plant Breed Rev. doi: 10.1002/9780470650226.ch4**  
Google Scholar: [Author Only](#) [Title Only](#) [Author and Title](#)
- Fridman E (2015) Consequences of hybridization and heterozygosity on plant vigor and phenotypic stability. Plant Sci 232: 35–40**  
Google Scholar: [Author Only](#) [Title Only](#) [Author and Title](#)
- Gajecka M, Marzec M, Chmielewska B, Jelonek J, Zbieszczek J, Szarejko I (2021) Changes in plastid biogenesis leading to the formation of albino regenerants in barley microspore culture. BMC Plant Biol 21: 1–24**  
Google Scholar: [Author Only](#) [Title Only](#) [Author and Title](#)
- Gellman MD, Turner JR (2020) Encyclopedia of Behavioral Medicine. Encycl Behav Med. doi: 10.1007/978-3-030-39903-0**  
Google Scholar: [Author Only](#) [Title Only](#) [Author and Title](#)
- Goff S a (2011) A unifying theory for general multigenic heterosis: energy efficiency, protein metabolism, and implications for molecular breeding. New Phytol 189: 923–37**  
Google Scholar: [Author Only](#) [Title Only](#) [Author and Title](#)
- Gordon VS, Staub JE (2011) Comparative analysis of chilling response in cucumber through plastidic and nuclear genetic effects component analysis. J Am Soc Hortic Sci 136: 256–264**  
Google Scholar: [Author Only](#) [Title Only](#) [Author and Title](#)
- Gould PD, Diaz P, Hogben C, Kusakina J, Salem R, Hartwell J, Hall A (2009) Delayed fluorescence as a universal tool for the measurement of circadian rhythms in higher plants. Plant J 58: 893–901**  
Google Scholar: [Author Only](#) [Title Only](#) [Author and Title](#)
- Hess WR, Prombona S, Fieder B, Subramanian AR, Borner T (1993) Chloroplast rps15 and the rpoB/C1/C2 gene cluster are strongly transcribed in ribosome-deficient plastids: Evidence for a functioning non-chloroplast-encoded RNA polymerase. EMBO J 12: 563–571**  
Google Scholar: [Author Only](#) [Title Only](#) [Author and Title](#)
- Hubner S, Höffken M, Oren E, Haseneyer G, Stein N, Graner A, Schmid K, Fridman E (2009) Strong correlation of wild barley (*Hordeum spontaneum*) population structure with temperature and precipitation variation. Mol Ecol 18: 1523–1536**  
Google Scholar: [Author Only](#) [Title Only](#) [Author and Title](#)



Izawa T, Mihara M, Suzuki Y, Gupta M, Itoh H, Nagano AJ, Motoyama R, Sawada Y, Yano M, Hirai MY, et al (2011) Os-GIGANTEA confers robust diurnal rhythms on the global transcriptome of rice in the field. *Plant Cell* 23: 1741–1755

Google Scholar: [Author Only](#) [Title Only](#) [Author and Title](#)

Kromdijk J, Glowacka K, Leonelli L, Gabilly ST, Iwai M, Niyogi KK, Long SP (2016) Improving photosynthesis and crop productivity by accelerating recovery from photoprotection. *Science* (80- ). doi: 10.1126/science.aai8878

Google Scholar: [Author Only](#) [Title Only](#) [Author and Title](#)

Lee S, Lee T, Yang S, Lee I (2020) BarleyNet : A Network-Based Functional Omics Analysis Server for Cultivated Barley , *Hordeum vulgare* L . 11: 1–11

Google Scholar: [Author Only](#) [Title Only](#) [Author and Title](#)

Li H, Ye G, Wang J (2007) A modified algorithm for the improvement of composite interval mapping. *Genetics* 175: 361–374

Google Scholar: [Author Only](#) [Title Only](#) [Author and Title](#)

Malosetti M, Ribaut JM, van Eeuwijk FA (2013) The statistical analysis of multi-environment data: Modeling genotype-by-environment interaction and its genetic basis. *Front Physiol*. doi: 10.3389/fphys.2013.00044

Google Scholar: [Author Only](#) [Title Only](#) [Author and Title](#)

Maurer A, Draba V, Jiang Y, Schnaithmann F, Sharma R, Schumann E, Kilian B, Reif JC, Pillen K (2015) Modelling the genetic architecture of flowering time control in barley through nested association mapping. *BMC Genomics* 16: 1–12

Google Scholar: [Author Only](#) [Title Only](#) [Author and Title](#)

Meng L, Li H, Zhang L, Wang J (2015) QTL IciMapping: Integrated software for genetic linkage map construction and quantitative trait locus mapping in biparental populations. *Crop J* 3: 269–283

Google Scholar: [Author Only](#) [Title Only](#) [Author and Title](#)

Naithani S, Gupta P, Preece J, Eustachio PD, Elser JL, Garg P, Dikeman DA, Kiff J, Cook J, Olson A, et al (2020) Plant Reactome : a knowledgebase and resource for comparative pathway analysis. 48: 1093–1103

Google Scholar: [Author Only](#) [Title Only](#) [Author and Title](#)

Nakazato I, Okuno M, Yamamoto H, Tamura Y, Itoh T, Shikanai T, Takanashi H, Tsutsumi N, Arimura S ichi (2021) Targeted base editing in the plastid genome of *Arabidopsis thaliana*. *Nat Plants*. doi: 10.1038/s41477-021-00954-6

Google Scholar: [Author Only](#) [Title Only](#) [Author and Title](#)

Noordally ZB, Ishii K, Atkins KA, Wetherill SJ, Kusakina J, Walton EJ, Kato M, Azuma M, Tanaka K, Hanaoka M, et al (2013) Circadian control of chloroplast transcription by a nuclear-encoded timing signal. *Nature* 339: 1316–9

Google Scholar: [Author Only](#) [Title Only](#) [Author and Title](#)

Novakazi F, Krusell L, Jensen JD, Orabi J, Jahoor A, Bengtsson T, On Behalf Of The Ppp Barley Consortium (2020) You Had Me at "MAGIC"! : Four Barley MAGIC Populations Reveal Novel Resistance QTL for Powdery Mildew. *Genes* (Basel). doi: 10.3390/genes11121512

Google Scholar: [Author Only](#) [Title Only](#) [Author and Title](#)

Panter PE, Muranaka T, Cuitun-Coronado D, Graham CA, Yochikawa A, Kudoh H, Dodd AN (2019) Circadian Regulation of the Plant Transcriptome Under Natural Conditions. *Front Genet* 10: 1–12

Google Scholar: [Author Only](#) [Title Only](#) [Author and Title](#)

Pfannschmidt T, Blanvillain R, Merendino L, Courtois F, Chevalier F, Liebers M, Grübler B, Hommel E, Lerbs-Mache S (2015) Plastid RNA polymerases: Orchestration of enzymes with different evolutionary origins controls chloroplast biogenesis during the plant life cycle. *J Exp Bot*. doi: 10.1093/jxb/erv415

Google Scholar: [Author Only](#) [Title Only](#) [Author and Title](#)

Prusty MR, Bdoiach E, Yamamoto E, Tiwari LD, Silberman R, Doron-Faigenbaum A, Neyhart JL, Bonfil D, Kashkush K, Pillen K, et al (2021) Genetic loci mediating circadian clock output plasticity and crop productivity under barley domestication. *New Phytol*. doi: 10.1111/nph.17284

Google Scholar: [Author Only](#) [Title Only](#) [Author and Title](#)

Ravi M, Marimuthu MPA, Tan EH, Maheshwari S, Henry IM, Marin-Rodriguez B, Urtecho G, Tan J, Thornhill K, Zhu F, et al (2014) A haploid genetics toolbox for *Arabidopsis thaliana*. *Nat Commun*. doi: 10.1038/ncomms6334

Google Scholar: [Author Only](#) [Title Only](#) [Author and Title](#)

Rees H, Duncan S, Gould P, Wells R, Greenwood M, Brabbs T, Hall A (2019) A high-throughput delayed fluorescence method reveals underlying differences in the control of circadian rhythms in *Triticum aestivum* and *Brassica napus*. *Plant Methods*. doi: 10.1186/s13007-019-0436-6

Google Scholar: [Author Only](#) [Title Only](#) [Author and Title](#)

Rees H, Joynson R, Brown JKM, Hall A (2021) Naturally occurring circadian rhythm variation associated with clock gene loci in Swedish *Arabidopsis* accessions. *Plant Cell Environ*. doi: 10.1111/pce.13941

Google Scholar: [Author Only](#) [Title Only](#) [Author and Title](#)

Sanetomo R, Gebhardt C (2015) Cytoplasmic genome types of European potatoes and their effects on complex agronomic traits. *BMC Plant Biol* 15: 162



Google Scholar: [Author Only](#) [Title Only](#) [Author and Title](#)

**Schnaithmann F, Kopahnke D, Pillen K (2014) A first step toward the development of a barley NAM population and its utilization to detect QTLs conferring leaf rust seedling resistance. Theor Appl Genet 127: 1513–1525**

Google Scholar: [Author Only](#) [Title Only](#) [Author and Title](#)

**Steiner S, Schröter Y, Pfalz J, Pfannschmidt T (2011) Identification of essential subunits in the plastid-encoded RNA polymerase complex reveals building Blocks for Proper plastid development. Plant Physiol. doi: 10.1104/pp.111.184515**

Google Scholar: [Author Only](#) [Title Only](#) [Author and Title](#)

**Tang Z, Hu W, Huang J, Lu X, Yang Z, Lei S, Zhang Y, Xu C (2014) Potential involvement of maternal cytoplasm in the regulation of flowering time via interaction with nuclear genes in maize. Crop Sci. doi: 10.2135/cropsci2013.07.0459**

Google Scholar: [Author Only](#) [Title Only](#) [Author and Title](#)

**Tindall AJ, Waller J, Greenwood M, Gould PD, Hartwell J, Hall A (2015) A comparison of high-throughput techniques for assaying circadian rhythms in plants. Plant Methods 11: 32**

Google Scholar: [Author Only](#) [Title Only](#) [Author and Title](#)

**Vishnukiran T, Neeraja CN, Jaldhani V, Vijayalakshmi P, Raghuvveer Rao P, Subrahmanyam D, Voleti SR (2020) A major pleiotropic QTL identified for yield components and nitrogen content in rice (*Oryza sativa* L.) under differential nitrogen field conditions. PLoS One 15: 1–22**

Google Scholar: [Author Only](#) [Title Only](#) [Author and Title](#)

**Zielinski T, Moore AM, Troup E, Halliday KJ, Millar AJ (2014) Strengths and limitations of period estimation methods for circadian data. PLoS One. doi: 10.1371/journal.pone.0096462**

Google Scholar: [Author Only](#) [Title Only](#) [Author and Title](#)
